# Supplementary material
Source: publisher site journal article supplement (https://www.dovepress.com/article/546669)
Supplement: Supplementary file 1 [file 546669%20Supplementary%20Materials.pdf]

## Supplementary Information

### No Genetic Causal Relationship between HIV Infection and Insulin Resistance , Diabetes: A Bidirectional Mendelian Randomization Analysis

Pengfei Liu<sup>1\*</sup>, Qiurong Zeng<sup>2</sup>

#### Table of contents

|          |                                            |
|----------|--------------------------------------------|
| Table S1 | Characteristics of GWAS Data in This Study |
| Table S2 | IVs in This Study                          |
| Table S3 | Heterogeneity in This Study                |
| Table S4 | MR-PRESSOs in This Study                   |
| Table S5 | Pleiotropy in This Study                   |

#### Figure of contents

|           |                                                                                 |
|-----------|---------------------------------------------------------------------------------|
| Figure S1 | MR Funnel Plots: HIV Infection to Insulin Resistance and Diabetes               |
| Figure S2 | MR Forest Plots: HIV Infection to Insulin Resistance and Diabetes               |
| Figure S3 | MR Leave-one-out plots : HIV Infection to Insulin Resistance and Diabetes       |
| Figure S4 | MR Funnel Plots: Insulin Resistance and Diabetes to HIV Infection               |
| Figure S5 | MR Forest Plots: Insulin Resistance and Diabetes to HIV Infection               |
| Figure S6 | MR Leave-one-out plots : Insulin Resistance and Diabetes to HIV Infections      |
| Figure S7 | MR Funnel, Forest and Leave-one-out plots:HIV Infection to Glycated hemoglobin  |
| Figure S8 | MR Funnel, Forest and Leave-one-out plots: Glycated hemoglobin to HIV Infection |

**Supplementary Information of Table**

**Table S1. Characteristics of GWAS Data for HIV Exposure and Related Outcomes**

| Variable        | GWAS ID              | Year | Author   | Population | Sample Size (N)                                        | SNP Count (N) | Data Source       |
|-----------------|----------------------|------|----------|------------|--------------------------------------------------------|---------------|-------------------|
| <b>Exposure</b> | HIV                  | 2021 | NA       | European   | N_case: 333, N_control: 218,435                        | 16,380,466    | Finnish Database  |
| <b>Outcome</b>  | Insulin Resistance   | 2010 | Dupuis J | European   | 37,037                                                 | 2,435,028     | GWAS Summary Data |
|                 | Type1 Diabetes       | 2021 | Chiou J  | European   | N_case:18,942, N_control: 501,638                      | 59,999,551    | GWAS Summary Data |
|                 | Type 2 Diabetes      | 2018 | Xue A    | European   | N_case: 61,714, N_control: 1,178, Sample Size: 655,666 | 5,030,727     | GWAS Summary Data |
|                 | Gestational Diabetes | 2021 | NA       | European   | N_case: 5,687, N_control: 117,892                      | 16,379,784    | Finnish Database  |
|                 | Glycated hemoglobin  | 2021 | Sakaue S | European   | 344,182                                                | 19,047,034    | GWAS Summary Data |

**Table S2. IVs****Table S2.1 HIV to Insulin resistance**

| SNP        | effect_allele | other_allele | beta.exposure | beta.outcome | eaf.exposure | eaf.outcome | pval.exposure | pval.outcome | se.exposure | se.outcome |
|------------|---------------|--------------|---------------|--------------|--------------|-------------|---------------|--------------|-------------|------------|
| rs10483438 | C             | T            | -0.346676     | -0.0036      | 0.228859     | 0.668       | 0.0000215     | 0.41970003   | 0.0815865   | 0.0045     |
| rs1532480  | T             | G            | -0.286738     | -0.0026      | 0.639061     | 0.427       | 0.0000123     | 0.558399473  | 0.0655862   | 0.0045     |
| rs17269691 | A             | G            | -0.579216     | -0.013       | 0.0809933    | 0.049       | 0.0000282     | 0.310900199  | 0.138328    | 0.013      |
| rs2412693  | G             | A            | 0.29924       | 0.0021       | 0.229913     | 0.792       | 0.0000386     | 0.671499974  | 0.0727046   | 0.005      |
| rs3814845  | G             | C            | -0.523701     | 0.014        | 0.094333     | 0.059       | 0.0000263     | 0.076190356  | 0.124594    | 0.0077     |
| rs7773195  | G             | A            | -0.394714     | -0.0062      | 0.870358     | 0.905       | 0.00000496    | 0.31629986   | 0.0864338   | 0.0062     |

**Table S2.2 HIV to Type 1 diabetes**

| SNP         | effect_allele | other_allele | beta.exposure | beta.outcome | eaf.exposure | eaf.outcome | pval.exposure | pval.outcome | se.exposure | se.outcome |
|-------------|---------------|--------------|---------------|--------------|--------------|-------------|---------------|--------------|-------------|------------|
| rs10483438  | C             | T            | -0.346676     | -0.010766    | 0.228859     | 0.287127    | 0.0000215     | 0.520453271  | 0.0815865   | 0.016753   |
| rs11229056  | T             | G            | 0.648557      | -0.045438    | 0.0291343    | 0.025434    | 0.0000394     | 0.371952646  | 0.157768    | 0.050892   |
| rs112847906 | T             | C            | 1.23293       | -0.110781    | 0.00536824   | 0.022964    | 0.0000269     | 0.031582724  | 0.293678    | 0.051534   |
| rs113042452 | A             | G            | 0.541512      | 0.03029      | 0.0437173    | 0.036964    | 0.000049      | 0.477892774  | 0.133366    | 0.04268    |
| rs113730997 | G             | A            | -1.02842      | -0.034696    | 0.0325033    | 0.030573    | 0.0000406     | 0.453569782  | 0.250599    | 0.046294   |
| rs114739803 | T             | C            | 0.949324      | -0.04648     | 0.0104438    | 0.021581    | 0.0000483     | 0.414451252  | 0.233599    | 0.056954   |
| rs115495781 | A             | G            | 0.462521      | -0.02783     | 0.0691068    | 0.058849    | 0.0000269     | 0.425109001  | 0.110176    | 0.034892   |
| rs117080829 | T             | C            | -0.6626       | -0.005306    | 0.0609806    | 0.069396    | 0.000043      | 0.859033414  | 0.16198     | 0.029873   |
| rs1269355   | G             | A            | 0.3553        | 0.010668     | 0.799566     | 0.797063    | 0.0000323     | 0.575474825  | 0.0854791   | 0.01905    |
| rs139924614 | G             | A            | 1.03417       | 0.010168     | 0.00814016   | 0.033681    | 0.0000394     | 0.813386223  | 0.251569    | 0.043073   |
| rs140234654 | T             | G            | 0.815413      | -0.164849    | 0.0218436    | 0.014393    | 0.00000376    | 0.020201479  | 0.176344    | 0.070976   |
| rs140494927 | C             | T            | 1.33385       | -0.055579    | 0.0050634    | 0.020067    | 0.0000102     | 0.285106285  | 0.302286    | 0.051996   |
| rs142210987 | T             | G            | 0.620235      | 0.022649     | 0.0383448    | 0.033387    | 0.0000129     | 0.625713008  | 0.142171    | 0.046434   |
| rs147007683 | G             | A            | 0.758806      | 0.063978     | 0.0203312    | 0.020789    | 0.0000364     | 0.283476058  | 0.183774    | 0.05965    |
| rs150909589 | C             | T            | 1.03731       | 0.058168     | 0.00982863   | 0.011116    | 0.00000479    | 0.431612383  | 0.226791    | 0.073964   |
| rs1532480   | T             | G            | -0.286738     | 0.011885     | 0.639061     | 0.563829    | 0.0000123     | 0.446946133  | 0.0655862   | 0.015628   |
| rs17269691  | A             | G            | -0.579216     | -0.013626    | 0.0809933    | 0.062482    | 0.0000282     | 0.677743509  | 0.138328    | 0.032792   |
| rs17453643  | A             | G            | -0.879171     | -0.000652    | 0.04056      | 0.040169    | 0.0000428     | 0.987337376  | 0.214874    | 0.041099   |
| rs184889799 | A             | G            | 1.45617       | -0.047506    | 0.00345243   | 0.01119     | 0.0000085     | 0.508186221  | 0.327066    | 0.071798   |
| rs192920181 | A             | G            | 1.11738       | 0.009979     | 0.00718895   | 0.011384    | 0.0000309     | 0.88887286   | 0.268164    | 0.071418   |

|            |   |   |           |           |            |          |            |             |           |          |
|------------|---|---|-----------|-----------|------------|----------|------------|-------------|-----------|----------|
| rs2412693  | G | A | 0.29924   | -0.014991 | 0.229913   | 0.239466 | 0.0000386  | 0.403219036 | 0.0727046 | 0.017934 |
| rs260650   | C | T | 0.261992  | 0.040046  | 0.452969   | 0.463383 | 0.0000424  | 0.009097807 | 0.0639943 | 0.015353 |
| rs35124027 | T | C | -0.343262 | -0.0227   | 0.214534   | 0.149615 | 0.0000471  | 0.345267125 | 0.0843488 | 0.024052 |
| rs6007065  | C | A | 0.902825  | 1.66E-02  | 0.0118176  | 0.033704 | 0.0000397  | 0.701547181 | 0.219707  | 0.043256 |
| rs61754819 | T | C | 1.84956   | 0.07243   | 0.00174539 | 0.010049 | 0.00000579 | 0.388415475 | 0.407936  | 0.083978 |
| rs62130114 | A | G | 0.360075  | -0.008682 | 0.156419   | 0.180313 | 0.000022   | 0.740546885 | 0.0848467 | 0.026219 |
| rs73094200 | A | C | 0.784236  | 0.037296  | 0.0189967  | 0.031721 | 0.0000304  | 0.408879119 | 0.18806   | 0.04516  |
| rs75697108 | G | T | -0.578206 | -0.033966 | 0.0846829  | 0.112686 | 0.0000169  | 0.179048431 | 0.134396  | 0.025278 |
| rs77097822 | C | T | 0.336696  | -0.000376 | 0.162433   | 0.118835 | 0.0000319  | 0.988151121 | 0.0809455 | 0.025317 |
| rs7773195  | G | A | -0.394714 | -0.005662 | 0.870358   | 0.887881 | 0.00000496 | 0.817782854 | 0.0864338 | 0.024577 |
| rs782082   | G | A | -0.289045 | -0.018048 | 0.720911   | 0.744092 | 0.0000325  | 0.316375645 | 0.0695615 | 0.018013 |
| rs80199944 | T | C | 0.974791  | 0.089418  | 0.0111053  | 0.012966 | 0.000016   | 0.166398692 | 0.22595   | 0.064615 |
| rs9814925  | C | T | -0.265374 | -0.020091 | 0.566191   | 0.563576 | 0.0000354  | 0.194328046 | 0.0641716 | 0.01548  |

**Table S2.3 HIV to Type 2 diabetes**

| SNP        | effect_allele | other_allele | beta.exposure | beta.outcome | eaf.exposure | eaf.outcome | pval.exposure | pval.outcome | se.exposure | se.outcome |
|------------|---------------|--------------|---------------|--------------|--------------|-------------|---------------|--------------|-------------|------------|
| rs10483438 | C             | T            | -0.346676     | 0.008        | 0.228859     | 0.300728    | 0.0000215     | 0.344899846  | 0.0815865   | 0.0084     |
| rs2412693  | G             | A            | 0.29924       | 0.0088       | 0.229913     | 0.24091     | 0.0000386     | 0.337800276  | 0.0727046   | 0.0092     |
| rs260650   | C             | T            | 0.261992      | 0.0082       | 0.452969     | 0.467277    | 0.0000424     | 0.305899664  | 0.0639943   | 0.008      |
| rs3814845  | G             | C            | -0.523701     | 0.0296       | 0.094333     | 0.0628996   | 0.0000263     | 0.061469545  | 0.124594    | 0.0158     |
| rs7773195  | G             | A            | -0.394714     | 0.0034       | 0.870358     | 0.893197    | 0.00000496    | 0.788700289  | 0.0864338   | 0.0126     |
| rs9814925  | C             | T            | -0.265374     | -0.0013      | 0.566191     | 0.569311    | 0.0000354     | 0.866799995  | 0.0641716   | 0.008      |

**Table S2.4 HIV to Gestational diabetes**

| SNP         | effect_allele | other_allele | beta.exposure | beta.outcome | eaf.exposure | eaf.outcome | pval.exposure | pval.outcome | se.exposure | se.outcome |
|-------------|---------------|--------------|---------------|--------------|--------------|-------------|---------------|--------------|-------------|------------|
| rs10483438  | C             | T            | -0.346676     | -0.00717025  | 0.228859     | 0.227999    | 0.0000215     | 0.629787     | 0.0815865   | 0.0148753  |
| rs11229056  | T             | G            | 0.648557      | -0.00848615  | 0.0291343    | 0.02925     | 0.0000394     | 0.816766     | 0.157768    | 0.0366245  |
| rs112847906 | T             | C            | 1.23293       | 0.0105762    | 0.00536824   | 0.00539167  | 0.0000269     | 0.902098     | 0.293678    | 0.0859772  |
| rs113042452 | A             | G            | 0.541512      | -0.00130401  | 0.0437173    | 0.043877    | 0.000049      | 0.965802     | 0.133366    | 0.0304147  |
| rs113730997 | G             | A            | -1.02842      | 0.0200478    | 0.0325033    | 0.0325433   | 0.0000406     | 0.57383      | 0.250599    | 0.0356456  |
| rs114739803 | T             | C            | 0.949324      | -0.105038    | 0.0104438    | 0.0102926   | 0.0000483     | 0.0907465    | 0.233599    | 0.0620985  |
| rs115495781 | A             | G            | 0.462521      | 0.00208885   | 0.0691068    | 0.0693497   | 0.0000269     | 0.931769     | 0.110176    | 0.0243968  |
| rs117080829 | T             | C            | -0.6626       | -0.017659    | 0.0609806    | 0.0608727   | 0.000043      | 0.49579      | 0.16198     | 0.0259261  |

|             |   |   |           |              |            |            |            |             |           |           |
|-------------|---|---|-----------|--------------|------------|------------|------------|-------------|-----------|-----------|
| rs1269355   | G | A | 0.3553    | 0.00342743   | 0.799566   | 0.7994     | 0.0000323  | 0.825365    | 0.0854791 | 0.0155333 |
| rs139924614 | G | A | 1.03417   | -0.0247916   | 0.00814016 | 0.00808687 | 0.0000394  | 0.720293    | 0.251569  | 0.0692372 |
| rs140234654 | T | G | 0.815413  | -0.0355532   | 0.0218436  | 0.0221011  | 0.00000376 | 0.403724    | 0.176344  | 0.0425793 |
| rs140494927 | C | T | 1.33385   | -0.0680551   | 0.0050634  | 0.00494321 | 0.0000102  | 0.440945    | 0.302286  | 0.0883147 |
| rs142210987 | T | G | 0.620235  | 0.0480191    | 0.0383448  | 0.0384234  | 0.0000129  | 0.147779    | 0.142171  | 0.0331756 |
| rs147007683 | G | A | 0.758806  | -0.0597454   | 0.0203312  | 0.020288   | 0.0000364  | 0.186315    | 0.183774  | 0.0452083 |
| rs150909589 | C | T | 1.03731   | -0.0369937   | 0.00982863 | 0.00996573 | 0.00000479 | 0.559992    | 0.226791  | 0.0634701 |
| rs1532480   | T | G | -0.286738 | -0.0169689   | 0.639061   | 0.638761   | 0.0000123  | 0.190598    | 0.0655862 | 0.0129651 |
| rs17269691  | A | G | -0.579216 | 0.0105257    | 0.0809933  | 0.0810595  | 0.0000282  | 0.64203     | 0.138328  | 0.0226426 |
| rs184889799 | A | G | 1.45617   | 0.211811     | 0.00345243 | 0.0034478  | 0.0000085  | 0.0518609   | 0.327066  | 0.10894   |
| rs192920181 | A | G | 1.11738   | 0.0327632    | 0.00718895 | 0.00701357 | 0.0000309  | 0.66523     | 0.268164  | 0.0757176 |
| rs2412693   | G | A | 0.29924   | 0.0492729    | 0.229913   | 0.229266   | 0.0000386  | 0.000784964 | 0.0727046 | 0.0146731 |
| rs260650    | C | T | 0.261992  | -0.000289263 | 0.452969   | 0.452719   | 0.0000424  | 0.98146     | 0.0639943 | 0.0124475 |
| rs35124027  | T | C | -0.343262 | -0.0118737   | 0.214534   | 0.21455    | 0.0000471  | 0.439039    | 0.0843488 | 0.0153443 |
| rs6007065   | C | A | 0.902825  | -0.0123357   | 0.0118176  | 0.01161    | 0.0000397  | 0.832556    | 0.219707  | 0.0583455 |
| rs61754819  | T | C | 1.84956   | 0.0825082    | 0.00174539 | 0.00170495 | 0.00000579 | 0.590317    | 0.407936  | 0.153254  |
| rs62130114  | A | G | 0.360075  | -0.0214477   | 0.156419   | 0.156394   | 0.000022   | 0.229404    | 0.0848467 | 0.0178449 |
| rs73094200  | A | C | 0.784236  | 0.00915116   | 0.0189967  | 0.018703   | 0.0000304  | 0.841236    | 0.18806   | 0.0456843 |
| rs75697108  | G | T | -0.578206 | 0.037597     | 0.0846829  | 0.0837368  | 0.0000169  | 0.0972098   | 0.134396  | 0.0226688 |
| rs77097822  | C | T | 0.336696  | -0.0163171   | 0.162433   | 0.162306   | 0.0000319  | 0.338912    | 0.0809455 | 0.0170624 |
| rs7773195   | G | A | -0.394714 | 0.000489584  | 0.870358   | 0.870484   | 0.00000496 | 0.978867    | 0.0864338 | 0.0184822 |
| rs782082    | G | A | -0.289045 | -0.0240078   | 0.720911   | 0.720728   | 0.0000325  | 0.0869401   | 0.0695615 | 0.0140252 |
| rs78431500  | C | G | 0.775123  | 0.0262372    | 0.0191092  | 0.0192178  | 0.0000283  | 0.566256    | 0.185133  | 0.0457434 |
| rs79588892  | T | A | 0.475928  | 0.00876096   | 0.0781947  | 0.0783832  | 0.00000527 | 0.705347    | 0.104516  | 0.0231702 |
| rs80199944  | T | C | 0.974791  | -3.77E-05    | 0.0111053  | 0.0112362  | 0.000016   | 0.999497    | 0.22595   | 0.0597134 |
| rs9814925   | C | T | -0.265374 | -0.0134862   | 0.566191   | 0.565885   | 0.0000354  | 0.281041    | 0.0641716 | 0.0125106 |

**Table S2.5 Insulin resistance to HIV**

| SNP        | effect_allele | other_allele | beta.exposure | beta.outcome | eaf.exposure | eaf.outcome | pval.exposure | pval.outcome | se.exposure | se.outcome |
|------------|---------------|--------------|---------------|--------------|--------------|-------------|---------------|--------------|-------------|------------|
| rs1015497  | C             | A            | 0.021         | 0.054342     | 0.75         | 0.279683    | 0.00000499    | 0.459436     | 0.0046      | 0.073457   |
| rs10426583 | C             | T            | -0.025        | -0.14246     | 0.875        | 0.213312    | 0.0000416     | 0.080281     | 0.0061      | 0.08145    |
| rs10510969 | C             | A            | -0.018        | -0.05268     | 0.725        | 0.333957    | 0.0000182     | 0.449407     | 0.0042      | 0.069645   |
| rs10763949 | G             | A            | -0.082        | 0.185567     | 0.992        | 0.951335    | 0.0000413     | 0.230136     | 0.02        | 0.154638   |

|            |   |   |        |          |       |          |            |          |        |          |
|------------|---|---|--------|----------|-------|----------|------------|----------|--------|----------|
| rs1078310  | G | C | 0.038  | -0.22367 | 0.92  | 0.963412 | 0.0000362  | 0.204769 | 0.0092 | 0.176388 |
| rs10954928 | A | G | -0.017 | 0.016036 | 0.348 | 0.385726 | 0.0000338  | 0.812942 | 0.0041 | 0.067765 |
| rs11167682 | T | G | 0.021  | 0.001065 | 0.199 | 0.257597 | 0.00000789 | 0.988818 | 0.0047 | 0.076008 |
| rs11206236 | A | G | -0.022 | -0.12633 | 0.177 | 0.116686 | 0.0000462  | 0.219257 | 0.0054 | 0.102834 |
| rs12206631 | T | C | -0.02  | -0.03835 | 0.281 | 0.204673 | 0.0000209  | 0.638084 | 0.0047 | 0.081522 |
| rs12430073 | A | G | -0.024 | -0.03787 | 0.138 | 0.119728 | 0.000035   | 0.709795 | 0.0058 | 0.101768 |
| rs12759838 | T | A | -0.026 | 0.046134 | 0.808 | 0.78003  | 0.00000147 | 0.566148 | 0.0054 | 0.080411 |
| rs12765415 | T | C | 0.034  | 0.145006 | 0.065 | 0.066562 | 0.000042   | 0.2723   | 0.0083 | 0.132091 |
| rs12867349 | C | T | 0.017  | -0.0952  | 0.683 | 0.330153 | 0.0000517  | 0.173362 | 0.0042 | 0.069922 |
| rs1475447  | C | T | 0.022  | 0.057227 | 0.743 | 0.804074 | 0.00000713 | 0.49231  | 0.0049 | 0.083344 |
| rs158805   | T | G | -0.019 | 0.027261 | 0.217 | 0.714982 | 0.0000362  | 0.708021 | 0.0046 | 0.07279  |
| rs17072350 | C | A | 0.023  | -0.15062 | 0.883 | 0.188211 | 0.0000289  | 0.072721 | 0.0055 | 0.083929 |
| rs17120908 | G | T | -0.025 | 0.067182 | 0.889 | 0.103902 | 0.0000416  | 0.539631 | 0.0061 | 0.109529 |
| rs17212430 | T | C | -0.039 | 0.036978 | 0.053 | 0.051548 | 0.0000224  | 0.805846 | 0.0092 | 0.150445 |
| rs17445157 | C | G | 0.032  | 0.132245 | 0.058 | 0.075091 | 0.0000324  | 0.291135 | 0.0077 | 0.125275 |
| rs17809779 | C | T | -0.064 | 0.076674 | 0.983 | 0.034303 | 0.0000633  | 0.674778 | 0.016  | 0.182732 |
| rs2074396  | A | C | 0.018  | -0.00807 | 0.283 | 0.66132  | 0.0000284  | 0.907724 | 0.0043 | 0.069651 |
| rs2108349  | A | G | -0.018 | -0.03231 | 0.288 | 0.529808 | 0.0000182  | 0.626978 | 0.0042 | 0.066477 |
| rs2142136  | G | C | 0.026  | -0.12445 | 0.733 | 0.888105 | 0.0000105  | 0.230979 | 0.0059 | 0.103897 |
| rs2414736  | C | T | -0.018 | 0.116888 | 0.575 | 0.50772  | 0.0000068  | 0.07714  | 0.004  | 0.066131 |
| rs2513319  | A | C | 0.02   | 0.021614 | 0.239 | 0.201776 | 0.0000309  | 0.79285  | 0.0048 | 0.082304 |
| rs2652616  | A | C | 0.029  | -0.00673 | 0.119 | 0.112671 | 0.0000563  | 0.948962 | 0.0072 | 0.105142 |
| rs2714559  | C | T | 0.021  | -0.0735  | 0.792 | 0.147194 | 0.0000182  | 0.432969 | 0.0049 | 0.093736 |
| rs2782527  | T | C | 0.036  | 0.034967 | 0.058 | 0.927805 | 0.0000284  | 0.781655 | 0.0086 | 0.126159 |
| rs2820232  | T | G | 0.018  | -0.00031 | 0.429 | 0.523351 | 0.0000068  | 0.996286 | 0.004  | 0.066435 |
| rs293540   | A | G | 0.03   | -0.07534 | 0.066 | 0.099099 | 0.0000503  | 0.495224 | 0.0074 | 0.110464 |
| rs35767    | G | A | 0.029  | -0.02388 | 0.885 | 0.783688 | 7.86E-08   | 0.766563 | 0.0054 | 0.080432 |
| rs4349616  | A | G | 0.018  | -0.02811 | 0.408 | 0.445728 | 0.0000113  | 0.673206 | 0.0041 | 0.06666  |
| rs4486414  | T | C | -0.04  | 0.037614 | 0.146 | 0.158244 | 0.00000881 | 0.676005 | 0.009  | 0.090003 |
| rs4782281  | C | T | -0.023 | 0.009837 | 0.823 | 0.142494 | 0.0000205  | 0.916872 | 0.0054 | 0.09425  |
| rs588262   | C | T | 0.065  | 0.266247 | 0.956 | 0.018183 | 0.00000344 | 0.304955 | 0.014  | 0.259534 |
| rs6061052  | G | A | 0.018  | -0.07225 | 0.655 | 0.325608 | 0.0000633  | 0.305178 | 0.0045 | 0.070459 |
| rs6479526  | T | C | 0.022  | 0.124009 | 0.204 | 0.183968 | 0.00000458 | 0.144896 | 0.0048 | 0.085066 |
| rs7006908  | T | C | -0.028 | -0.07032 | 0.084 | 0.084228 | 0.0000293  | 0.558393 | 0.0067 | 0.120163 |
| rs7116432  | G | A | 0.019  | -0.06034 | 0.676 | 0.348029 | 0.00000993 | 0.383666 | 0.0043 | 0.06926  |

|           |   |   |        |          |       |          |            |          |        |          |
|-----------|---|---|--------|----------|-------|----------|------------|----------|--------|----------|
| rs7549953 | T | C | -0.032 | -0.05276 | 0.248 | 0.333271 | 0.0000409  | 0.452672 | 0.0078 | 0.070258 |
| rs7708079 | T | C | -0.042 | -0.16343 | 0.071 | 0.963286 | 0.00000392 | 0.348654 | 0.0091 | 0.174381 |
| rs780094  | C | T | 0.02   | -0.15254 | 0.606 | 0.644155 | 0.00000107 | 0.026545 | 0.0041 | 0.068767 |
| rs8047573 | T | G | -0.03  | -0.08265 | 0.124 | 0.08694  | 0.00000548 | 0.484385 | 0.0066 | 0.118199 |
| rs9394179 | C | T | -0.02  | -0.01958 | 0.615 | 0.541466 | 0.0000447  | 0.766426 | 0.0049 | 0.065922 |
| rs9516955 | A | G | -0.15  | -0.04898 | 0.008 | 0.009691 | 0.0000309  | 0.882947 | 0.036  | 0.332697 |
| rs960662  | T | C | 0.05   | 0.2532   | 0.054 | 0.027874 | 0.0000309  | 0.212094 | 0.012  | 0.202913 |
| rs9822959 | G | T | -0.02  | 0.036694 | 0.71  | 0.640115 | 0.00000192 | 0.5936   | 0.0042 | 0.068763 |

**Table S2.6 Type 1 diabetes to HIV**

| SNP         | effect_allele | other_allele | beta.exposure | beta.outcome | eaf.exposure | eaf.outcome | pval.exposure | pval.outcome | se.exposure | se.outcome |
|-------------|---------------|--------------|---------------|--------------|--------------|-------------|---------------|--------------|-------------|------------|
| rs10224046  | G             | T            | 0.085811      | 0.061371     | 0.324266     | 0.378407    | 2.71E-08      | 0.365638     | 0.015436    | 0.067838   |
| rs1050979   | G             | A            | 0.106196      | 0.102929     | 0.515138     | 0.47465     | 5.64E-14      | 0.117397     | 0.014129    | 0.065736   |
| rs10751776  | C             | A            | 0.078145      | -0.02912     | 0.509915     | 0.551725    | 2.67E-08      | 0.659427     | 0.01405     | 0.066066   |
| rs10801128  | G             | A            | 0.096073      | 0.145097     | 0.717441     | 0.745567    | 8.97E-10      | 0.054948     | 0.015681    | 0.0756     |
| rs11203203  | A             | G            | 0.143803      | -0.02063     | 0.348548     | 0.279768    | 1.81E-23      | 0.778019     | 0.014405    | 0.073178   |
| rs112647257 | T             | A            | -0.72188      | -0.07193     | 0.052653     | 0.056375    | 1.51E-79      | 0.614765     | 0.038225    | 0.142912   |
| rs114278107 | G             | T            | -0.14616      | -0.12772     | 0.173912     | 0.143228    | 1.85E-13      | 0.176797     | 0.019861    | 0.09456    |
| rs114378220 | T             | C            | 0.177902      | -0.23086     | 0.070292     | 0.058088    | 5.11E-09      | 0.103909     | 0.030444    | 0.141963   |
| rs12128789  | C             | T            | 0.126969      | -0.02517     | 0.131779     | 0.114208    | 3.73E-09      | 0.80792      | 0.021535    | 0.103513   |
| rs12257077  | T             | C            | 0.231245      | 0.459473     | 0.031887     | 0.018013    | 3.91E-10      | 0.058513     | 0.036955    | 0.242871   |
| rs12464462  | G             | A            | -0.08796      | -0.01673     | 0.410445     | 0.386469    | 8.62E-10      | 0.805382     | 0.014341    | 0.067895   |
| rs12644686  | G             | C            | -0.10775      | -0.04622     | 0.193778     | 0.252099    | 2.45E-08      | 0.544345     | 0.01932     | 0.076236   |
| rs12665124  | T             | G            | -0.49498      | -0.01321     | 0.013205     | 0.025544    | 2.82E-12      | 0.949665     | 0.070847    | 0.209271   |
| rs12742756  | G             | A            | -0.08311      | -0.07567     | 0.428204     | 0.452514    | 3.54E-08      | 0.253574     | 0.015077    | 0.066277   |
| rs12927355  | T             | C            | -0.20388      | 0.056929     | 0.316184     | 0.302576    | 4.39E-41      | 0.427621     | 0.015188    | 0.071765   |
| rs13147049  | G             | A            | -0.10952      | -0.05631     | 0.640501     | 0.546572    | 8.92E-14      | 0.394248     | 0.014689    | 0.066097   |
| rs13259300  | C             | A            | -0.09219      | 0.005703     | 0.598278     | 0.573728    | 3.28E-10      | 0.93191      | 0.014669    | 0.066749   |
| rs1350275   | G             | T            | -0.09367      | 0.051215     | 0.69842      | 0.615058    | 8.86E-10      | 0.449831     | 0.015283    | 0.067772   |
| rs1574285   | T             | G            | -0.12655      | -0.11283     | 0.591106     | 0.559723    | 4.26E-19      | 0.089768     | 0.014171    | 0.0665     |
| rs1701704   | G             | T            | 0.244048      | 0.02407      | 0.339425     | 0.31947     | 4.49E-63      | 0.733        | 0.014558    | 0.070558   |
| rs17106304  | G             | C            | 0.115351      | 0.017206     | 0.655978     | 0.655557    | 6.83E-15      | 0.804323     | 0.014812    | 0.069447   |
| rs17323934  | G             | C            | -0.12966      | 0.030628     | 0.223075     | 0.184487    | 1.26E-14      | 0.719121     | 0.016818    | 0.085164   |
| rs17623914  | C             | T            | -0.13489      | 0.013317     | 0.099705     | 0.07085     | 7.97E-09      | 0.919        | 0.023381    | 0.130952   |

|            |   |   |          |          |          |          |             |          |          |          |
|------------|---|---|----------|----------|----------|----------|-------------|----------|----------|----------|
| rs1881146  | T | A | -0.09517 | -0.03345 | 0.310529 | 0.275577 | 4.57E-08    | 0.649723 | 0.017407 | 0.07366  |
| rs1947178  | G | A | -0.10327 | -0.03395 | 0.791944 | 0.851322 | 1.67E-09    | 0.717589 | 0.017134 | 0.093854 |
| rs202535   | A | C | -0.14144 | -0.12306 | 0.827931 | 0.786378 | 1.79E-14    | 0.123898 | 0.018453 | 0.079982 |
| rs2111485  | G | A | 0.127631 | 0.075902 | 0.604162 | 0.582732 | 1.05E-18    | 0.256356 | 0.014455 | 0.066871 |
| rs2188962  | T | C | 0.07946  | 0.059507 | 0.403956 | 0.31761  | 1.73E-08    | 0.400737 | 0.014096 | 0.070816 |
| rs229527   | A | C | 0.104077 | 0.018447 | 0.416388 | 0.394066 | 1.82E-13    | 0.784208 | 0.014138 | 0.067366 |
| rs231972   | C | A | 0.170939 | 0.037476 | 0.118029 | 0.090676 | 5.12E-16    | 0.744286 | 0.021081 | 0.114894 |
| rs238265   | G | T | -0.09083 | 0.013388 | 0.695162 | 0.677953 | 2.07E-09    | 0.849918 | 0.015158 | 0.070751 |
| rs2395471  | A | G | -0.52212 | 0.015366 | 0.365798 | 0.427893 | 9.53E-224   | 0.817723 | 0.016351 | 0.066673 |
| rs2493411  | C | T | 0.127063 | -0.00976 | 0.13231  | 0.168138 | 1.28E-08    | 0.912539 | 0.022335 | 0.088874 |
| rs2523679  | T | C | 0.711041 | 0.027875 | 0.096365 | 0.138792 | 6.43E-211   | 0.766581 | 0.022941 | 0.093901 |
| rs2543537  | T | C | -0.08344 | -0.05131 | 0.459649 | 0.510233 | 5.59E-09    | 0.438802 | 0.014316 | 0.066275 |
| rs2611211  | T | C | -0.14385 | 0.082077 | 0.823656 | 0.761472 | 1.39E-14    | 0.290727 | 0.018689 | 0.077685 |
| rs3024493  | A | C | -0.16386 | -0.02485 | 0.154343 | 0.156136 | 7.27E-17    | 0.7848   | 0.019641 | 0.091018 |
| rs3087243  | A | G | -0.19913 | 0.028005 | 0.422477 | 0.329685 | 1.16E-44    | 0.690154 | 0.014202 | 0.070251 |
| rs3184504  | C | T | -0.2315  | 0.014043 | 0.53291  | 0.592373 | 1.08E-60    | 0.833941 | 0.014086 | 0.066982 |
| rs34536443 | C | G | -0.38533 | 0.12721  | 0.042706 | 0.030225 | 1.47E-23    | 0.511555 | 0.038519 | 0.193795 |
| rs34593439 | A | G | -0.21807 | -0.08077 | 0.108188 | 0.12722  | 1.55E-19    | 0.416938 | 0.024119 | 0.099507 |
| rs35327136 | A | C | -0.1192  | -0.13103 | 0.155548 | 0.052815 | 3.37E-10    | 0.386825 | 0.018978 | 0.151411 |
| rs3802214  | C | T | -0.10661 | 0.116969 | 0.798827 | 0.73365  | 2.96E-08    | 0.114579 | 0.01923  | 0.074128 |
| rs41295159 | G | C | -0.69955 | -0.30135 | 0.008954 | 0.001769 | 9.11E-15    | 0.723123 | 0.090252 | 0.850573 |
| rs4548024  | C | T | -0.09574 | -0.03729 | 0.233601 | 0.222624 | 9.94E-09    | 0.640175 | 0.016703 | 0.079783 |
| rs4820827  | C | T | -0.12966 | 0.117471 | 0.620943 | 0.684461 | 1.01E-19    | 0.096832 | 0.014267 | 0.070748 |
| rs55893453 | G | A | 0.094653 | -0.00013 | 0.201792 | 0.160045 | 4.63E-08    | 0.998888 | 0.01732  | 0.091121 |
| rs55969931 | G | T | -0.45999 | -0.21574 | 0.042147 | 0.016901 | 1.53E-33    | 0.408835 | 0.038112 | 0.261198 |
| rs55993634 | G | C | 0.219371 | -0.03027 | 0.084897 | 0.087239 | 2.29E-19    | 0.794622 | 0.024379 | 0.116271 |
| rs56994090 | C | T | -0.13426 | 0.167436 | 0.431066 | 0.49402  | 3.6E-20     | 0.011427 | 0.014594 | 0.066197 |
| rs57209021 | T | C | 0.100693 | 0.00337  | 0.225582 | 0.21057  | 3.73E-08    | 0.967013 | 0.018297 | 0.08149  |
| rs574384   | A | C | -0.1336  | -0.01061 | 0.894668 | 0.873052 | 0.000000022 | 0.915261 | 0.023876 | 0.099686 |
| rs601338   | A | G | 0.127096 | 0.05528  | 0.478792 | 0.374783 | 1.2E-18     | 0.417437 | 0.014419 | 0.068173 |
| rs607703   | T | C | 0.092015 | 0.043955 | 0.484409 | 0.527545 | 1.17E-10    | 0.506818 | 0.01428  | 0.066217 |
| rs61759532 | T | C | 0.118379 | -0.02407 | 0.234556 | 0.189212 | 1.9E-10     | 0.774367 | 0.018587 | 0.083955 |
| rs61839660 | T | C | -0.35744 | -0.1026  | 0.08512  | 0.040882 | 5.26E-43    | 0.53945  | 0.026    | 0.167204 |
| rs6434435  | A | G | -0.12286 | 0.102176 | 0.159884 | 0.106389 | 1.23E-10    | 0.341048 | 0.019089 | 0.107317 |
| rs663743   | A | G | -0.09996 | 0.006148 | 0.349007 | 0.375779 | 3.5E-11     | 0.92826  | 0.015092 | 0.068281 |

|            |   |   |          |          |          |          |           |          |          |          |
|------------|---|---|----------|----------|----------|----------|-----------|----------|----------|----------|
| rs6679677  | A | C | 0.64172  | -0.13234 | 0.113692 | 0.146426 | 2.76E-206 | 0.153883 | 0.020938 | 0.09281  |
| rs6908626  | T | G | 0.202923 | 0.006261 | 0.165571 | 0.115162 | 6.15E-28  | 0.951489 | 0.01852  | 0.102917 |
| rs7068821  | T | G | -0.1651  | 0.045833 | 0.251126 | 0.229852 | 5.06E-24  | 0.559187 | 0.016333 | 0.078474 |
| rs7110099  | G | A | 0.662564 | 0.133256 | 0.786548 | 0.838793 | 2.92E-236 | 0.141362 | 0.020187 | 0.090605 |
| rs722988   | C | T | 0.082649 | -0.07432 | 0.353008 | 0.306907 | 9.77E-09  | 0.300097 | 0.014412 | 0.071717 |
| rs7237497  | C | T | -0.22047 | 0.009433 | 0.839298 | 0.858635 | 2.71E-32  | 0.919934 | 0.018635 | 0.093849 |
| rs72838204 | T | C | 0.376892 | 0.075337 | 0.062339 | 0.079643 | 4.26E-41  | 0.531769 | 0.028072 | 0.120479 |
| rs7668577  | C | A | 0.093652 | 0.104491 | 0.311698 | 0.310454 | 7.27E-10  | 0.140769 | 0.015203 | 0.070941 |
| rs7776597  | G | A | 0.244413 | 0.120465 | 0.959079 | 0.975135 | 1.82E-11  | 0.574434 | 0.036372 | 0.214528 |
| rs7795896  | T | C | -0.13544 | 0.075032 | 0.691577 | 0.65005  | 1.58E-16  | 0.27707  | 0.016416 | 0.069031 |
| rs78325861 | G | C | -0.28208 | -0.20657 | 0.039037 | 0.03386  | 2.31E-11  | 0.259253 | 0.042195 | 0.183107 |
| rs8046043  | C | G | -0.08459 | 0.075293 | 0.391629 | 0.314352 | 2.49E-08  | 0.290926 | 0.015175 | 0.071294 |
| rs855330   | C | T | 0.111208 | 0.053809 | 0.259422 | 0.357543 | 4.89E-11  | 0.435066 | 0.016916 | 0.068937 |
| rs9517712  | C | T | -0.10206 | 0.009862 | 0.740981 | 0.717471 | 1.06E-10  | 0.892763 | 0.015805 | 0.073154 |

**Table S2.7 Type 2 diabetes to HIV**

| SNP        | effect_allele | other_allele | beta.exposure | beta.outcome | eaf.exposure | eaf.outcome | pval.exposure | pval.outcome | se.exposure | se.outcome |
|------------|---------------|--------------|---------------|--------------|--------------|-------------|---------------|--------------|-------------|------------|
| rs10077431 | A             | C            | -0.0487       | -0.04052     | 0.214668     | 0.17605     | 4.45E-08      | 0.640077     | 0.0089      | 0.08666    |
| rs10087241 | A             | G            | -0.0475       | 0.128772     | 0.594893     | 0.63883     | 2.89E-09      | 0.063269     | 0.008       | 0.069333   |
| rs10100265 | C             | A            | -0.0491       | 0.015921     | 0.61049      | 0.542346    | 5.13E-10      | 0.810391     | 0.0079      | 0.06636    |
| rs10114341 | C             | T            | -0.0409       | -0.08417     | 0.440754     | 0.42426     | 1.34E-08      | 0.208851     | 0.0072      | 0.066976   |
| rs10401969 | C             | T            | 0.0921        | 0.153703     | 0.076586     | 0.063531    | 4.37E-12      | 0.25725      | 0.0133      | 0.13567    |
| rs1050226  | G             | A            | -0.0491       | -0.02714     | 0.406792     | 0.376573    | 3.24E-11      | 0.689579     | 0.0074      | 0.067953   |
| rs1061813  | A             | G            | -0.0429       | -0.01401     | 0.537119     | 0.620138    | 4.18E-09      | 0.836861     | 0.0073      | 0.068035   |
| rs1063355  | G             | T            | 0.0709        | -0.01927     | 0.602436     | 0.523192    | 2.84E-19      | 0.770896     | 0.0079      | 0.066169   |
| rs10740322 | A             | G            | 0.0477        | 0.027902     | 0.687104     | 0.741355    | 0.00000002    | 0.712672     | 0.0085      | 0.075765   |
| rs10811661 | C             | T            | -0.1569       | -0.08677     | 0.173605     | 0.142596    | 1.08E-57      | 0.359754     | 0.0098      | 0.094747   |
| rs10830963 | G             | C            | 0.0909        | 0.116021     | 0.275768     | 0.35704     | 6.43E-30      | 0.091893     | 0.008       | 0.068835   |
| rs10842994 | T             | C            | -0.0755       | 0.041565     | 0.197025     | 0.172891    | 1.07E-16      | 0.631863     | 0.0091      | 0.086756   |
| rs10974438 | C             | A            | 0.0591        | 0.069227     | 0.351215     | 0.375409    | 3.27E-15      | 0.308742     | 0.0075      | 0.068012   |
| rs11098676 | C             | T            | 0.054         | 0.003586     | 0.787639     | 0.821355    | 1.86E-08      | 0.966549     | 0.0096      | 0.085517   |
| rs11107116 | T             | G            | 0.0467        | -0.13784     | 0.219714     | 0.25083     | 3.93E-08      | 0.070346     | 0.0085      | 0.076169   |
| rs11257655 | T             | C            | 0.0737        | -0.13568     | 0.206773     | 0.264877    | 2.43E-17      | 0.07133      | 0.0087      | 0.075238   |
| rs1127655  | T             | C            | -0.0438       | -0.03541     | 0.529064     | 0.534842    | 2.95E-08      | 0.592253     | 0.0079      | 0.066118   |

|            |   |   |         |          |          |          |             |          |        |          |
|------------|---|---|---------|----------|----------|----------|-------------|----------|--------|----------|
| rs11708067 | G | A | -0.0965 | 0.07286  | 0.23899  | 0.169691 | 3.22E-29    | 0.405832 | 0.0086 | 0.087651 |
| rs11925227 | A | G | -0.0534 | -0.11347 | 0.183439 | 0.195617 | 0.000000019 | 0.171707 | 0.0095 | 0.083024 |
| rs11926707 | C | T | 0.0463  | -0.09867 | 0.625556 | 0.652225 | 1.64E-08    | 0.157122 | 0.0082 | 0.069737 |
| rs12088739 | G | A | -0.0884 | -0.08888 | 0.089848 | 0.059167 | 1.05E-11    | 0.529387 | 0.013  | 0.14131  |
| rs12299509 | G | A | 0.0467  | 0.017215 | 0.478622 | 0.509798 | 1.58E-10    | 0.796531 | 0.0073 | 0.066765 |
| rs12617659 | T | C | -0.0685 | -0.02067 | 0.147238 | 0.149512 | 2.92E-11    | 0.823992 | 0.0103 | 0.092948 |
| rs12910825 | G | A | 0.0517  | -0.02705 | 0.360391 | 0.369    | 2.82E-12    | 0.691156 | 0.0074 | 0.068087 |
| rs12945601 | C | T | -0.048  | 0.045155 | 0.613603 | 0.563155 | 1.97E-09    | 0.495536 | 0.008  | 0.066256 |
| rs12970134 | A | G | 0.0555  | 0.09996  | 0.26512  | 0.196159 | 3.99E-12    | 0.227313 | 0.008  | 0.082795 |
| rs13239186 | T | C | 0.0539  | -0.05156 | 0.302029 | 0.365697 | 2.28E-10    | 0.452549 | 0.0085 | 0.068644 |
| rs1333039  | C | G | 0.0534  | 0.018673 | 0.598788 | 0.602947 | 5.35E-13    | 0.782108 | 0.0074 | 0.067517 |
| rs13330951 | G | A | -0.0456 | -0.025   | 0.488314 | 0.499099 | 1.81E-08    | 0.706399 | 0.0081 | 0.066359 |
| rs13389219 | T | C | -0.0722 | 0.030203 | 0.394368 | 0.349159 | 1.73E-22    | 0.663043 | 0.0074 | 0.069318 |
| rs1359790  | A | G | -0.0796 | -0.00089 | 0.2867   | 0.293988 | 2.52E-23    | 0.990177 | 0.008  | 0.072679 |
| rs1496653  | G | A | -0.0769 | 0.084638 | 0.204782 | 0.311024 | 2.36E-18    | 0.234911 | 0.0088 | 0.071256 |
| rs1552224  | C | A | -0.1034 | 0.007807 | 0.15421  | 0.236928 | 1.34E-24    | 0.91978  | 0.0101 | 0.07752  |
| rs16988333 | G | A | -0.0745 | 0.027643 | 0.090404 | 0.085039 | 0.00000001  | 0.816742 | 0.013  | 0.119287 |
| rs17086692 | T | G | -0.0467 | -0.00431 | 0.313426 | 0.312509 | 2.71E-08    | 0.95158  | 0.0084 | 0.071036 |
| rs17168486 | T | C | 0.0742  | -0.04744 | 0.173603 | 0.198118 | 2.94E-15    | 0.565094 | 0.0094 | 0.082461 |
| rs17334919 | T | C | -0.1398 | 0.008962 | 0.100218 | 0.048506 | 9.06E-28    | 0.954236 | 0.0128 | 0.156164 |
| rs17405722 | A | G | 0.087   | -0.0913  | 0.074153 | 0.10079  | 2.54E-09    | 0.397191 | 0.0146 | 0.107839 |
| rs17411031 | G | C | -0.045  | -0.02724 | 0.261729 | 0.245537 | 2.77E-08    | 0.721029 | 0.0081 | 0.076297 |
| rs17631783 | T | C | -0.0487 | -0.04896 | 0.26346  | 0.228258 | 4.45E-08    | 0.53313  | 0.0089 | 0.078565 |
| rs17791483 | G | A | -0.102  | -0.07536 | 0.062588 | 0.120947 | 3.96E-12    | 0.455134 | 0.0147 | 0.1009   |
| rs1801214  | T | C | 0.0903  | 0.023812 | 0.599585 | 0.577087 | 3.01E-34    | 0.720961 | 0.0074 | 0.066668 |
| rs1899951  | T | C | -0.1118 | -0.0204  | 0.123288 | 0.170418 | 1.1E-24     | 0.816449 | 0.0109 | 0.087887 |
| rs2191348  | T | G | 0.0652  | -0.06188 | 0.546935 | 0.458856 | 4.2E-19     | 0.349001 | 0.0073 | 0.066078 |
| rs2237892  | T | C | -0.096  | -0.02249 | 0.06249  | 0.051684 | 9.68E-10    | 0.879739 | 0.0157 | 0.148665 |
| rs2246618  | T | C | 0.0513  | -0.06391 | 0.307253 | 0.294605 | 1.01E-09    | 0.372031 | 0.0084 | 0.071589 |
| rs2261181  | T | C | 0.0985  | -0.0145  | 0.09647  | 0.072995 | 6.97E-17    | 0.908186 | 0.0118 | 0.125752 |
| rs2292662  | T | C | -0.0629 | -0.02826 | 0.151272 | 0.217231 | 1.46E-08    | 0.723617 | 0.0111 | 0.079926 |
| rs2294120  | G | A | -0.0443 | -0.06335 | 0.455879 | 0.465134 | 2.05E-08    | 0.338792 | 0.0079 | 0.066228 |
| rs2296173  | G | A | 0.065   | 0.004958 | 0.212011 | 0.190255 | 7.94E-14    | 0.952805 | 0.0087 | 0.083773 |
| rs2299383  | T | C | 0.0412  | -0.04064 | 0.423455 | 0.465348 | 1.66E-08    | 0.54008  | 0.0073 | 0.066326 |
| rs243019   | C | T | 0.0566  | -0.04987 | 0.455831 | 0.448757 | 1.56E-15    | 0.451278 | 0.0071 | 0.066203 |

|            |   |   |         |          |          |          |           |          |        |          |
|------------|---|---|---------|----------|----------|----------|-----------|----------|--------|----------|
| rs2493394  | G | A | 0.073   | 0.00081  | 0.107338 | 0.136931 | 1.05E-10  | 0.993308 | 0.0113 | 0.096621 |
| rs2796441  | A | G | -0.0715 | -0.02909 | 0.416458 | 0.417263 | 1.19E-22  | 0.663239 | 0.0073 | 0.066802 |
| rs2820426  | G | A | 0.0521  | 0.015339 | 0.610058 | 0.613435 | 9.54E-13  | 0.820828 | 0.0073 | 0.067729 |
| rs2867125  | C | T | 0.0601  | 0.001184 | 0.827825 | 0.835224 | 3.84E-10  | 0.989377 | 0.0096 | 0.088911 |
| rs2908282  | A | G | 0.0552  | -0.06257 | 0.177395 | 0.106373 | 4.3E-09   | 0.560178 | 0.0094 | 0.1074   |
| rs2925979  | C | T | -0.0534 | -0.11539 | 0.70085  | 0.677185 | 7.59E-12  | 0.102112 | 0.0078 | 0.070588 |
| rs2972144  | G | A | 0.0913  | -0.07343 | 0.645367 | 0.639936 | 4.31E-34  | 0.287142 | 0.0075 | 0.068984 |
| rs340874   | C | T | 0.0626  | -0.11284 | 0.563904 | 0.43159  | 9.88E-18  | 0.089977 | 0.0073 | 0.066551 |
| rs348330   | A | G | -0.0487 | -0.00241 | 0.633451 | 0.644812 | 1.83E-09  | 0.972218 | 0.0081 | 0.069183 |
| rs35011184 | A | G | 0.2796  | -0.10158 | 0.227133 | 0.168541 | 1.54E-221 | 0.254333 | 0.0088 | 0.089115 |
| rs3756784  | G | T | 0.0505  | 0.026285 | 0.185838 | 0.220552 | 2.87E-08  | 0.7416   | 0.0091 | 0.079715 |
| rs3802177  | A | G | -0.1217 | -0.01962 | 0.311281 | 0.3754   | 2.92E-52  | 0.772981 | 0.008  | 0.068021 |
| rs459193   | G | A | 0.0711  | -0.05453 | 0.745338 | 0.682928 | 1.07E-17  | 0.440691 | 0.0083 | 0.070725 |
| rs4686471  | C | T | 0.0534  | -0.02672 | 0.609775 | 0.609952 | 4.32E-11  | 0.69298  | 0.0081 | 0.067676 |
| rs4810426  | T | C | 0.0726  | 0.018641 | 0.096789 | 0.144944 | 2.34E-08  | 0.84178  | 0.013  | 0.093385 |
| rs4823182  | G | A | 0.0482  | -0.05008 | 0.335748 | 0.443026 | 3.86E-10  | 0.450496 | 0.0077 | 0.066365 |
| rs4865796  | A | G | 0.053   | 0.062447 | 0.69309  | 0.668753 | 1.08E-11  | 0.37107  | 0.0078 | 0.069815 |
| rs516946   | C | T | 0.0824  | 0.042172 | 0.760633 | 0.795665 | 3.19E-22  | 0.606672 | 0.0085 | 0.081914 |
| rs5215     | T | C | -0.0678 | 0.115068 | 0.639941 | 0.526923 | 1.58E-20  | 0.080831 | 0.0073 | 0.065908 |
| rs576674   | A | G | -0.0654 | -0.09486 | 0.832515 | 0.905637 | 1.56E-11  | 0.408905 | 0.0097 | 0.114869 |
| rs6059662  | G | A | 0.0446  | -0.0262  | 0.663176 | 0.770891 | 1.65E-08  | 0.739249 | 0.0079 | 0.078725 |
| rs6066138  | A | G | -0.049  | 0.018984 | 0.278362 | 0.213758 | 2.29E-09  | 0.813654 | 0.0082 | 0.080538 |
| rs61953351 | T | G | -0.07   | -0.08764 | 0.249902 | 0.283947 | 1.45E-14  | 0.234264 | 0.0091 | 0.073681 |
| rs622217   | C | T | -0.0485 | -0.00861 | 0.483932 | 0.502584 | 3E-10     | 0.895631 | 0.0077 | 0.065627 |
| rs6515236  | C | A | -0.0504 | -0.20681 | 0.24933  | 0.209059 | 3.05E-08  | 0.011161 | 0.0091 | 0.081498 |
| rs67232546 | T | C | 0.0596  | -0.01144 | 0.209222 | 0.151655 | 5.35E-10  | 0.901352 | 0.0096 | 0.092293 |
| rs6795735  | T | C | -0.0558 | 0.042003 | 0.410912 | 0.359758 | 2.11E-14  | 0.539658 | 0.0073 | 0.068484 |
| rs6878122  | A | G | -0.0564 | 0.02049  | 0.681791 | 0.771809 | 9.38E-13  | 0.79501  | 0.0079 | 0.078865 |
| rs7138300  | T | C | -0.0443 | 0.027631 | 0.556835 | 0.629536 | 7.61E-10  | 0.684977 | 0.0072 | 0.068109 |
| rs7144011  | T | G | 0.0482  | 0.037091 | 0.221063 | 0.241166 | 1.42E-08  | 0.631568 | 0.0085 | 0.077349 |
| rs7177055  | A | G | 0.0647  | 0.004748 | 0.718289 | 0.693277 | 2.62E-16  | 0.946906 | 0.0079 | 0.071297 |
| rs7185735  | G | A | 0.1056  | -0.01697 | 0.397306 | 0.40213  | 1.99E-47  | 0.800088 | 0.0073 | 0.067032 |
| rs7240767  | C | T | 0.0451  | 0.082733 | 0.383677 | 0.394622 | 2.58E-08  | 0.220366 | 0.0081 | 0.067506 |
| rs72892910 | T | G | 0.0648  | -0.01826 | 0.172394 | 0.203454 | 5.93E-11  | 0.824063 | 0.0099 | 0.08212  |
| rs735949   | C | T | -0.0711 | -0.12609 | 0.14115  | 0.102577 | 1.98E-11  | 0.248093 | 0.0106 | 0.10917  |

|            |   |   |         |          |          |          |          |          |        |          |
|------------|---|---|---------|----------|----------|----------|----------|----------|--------|----------|
| rs753270   | C | T | 0.0528  | 0.06366  | 0.583535 | 0.578149 | 2.33E-11 | 0.341257 | 0.0079 | 0.066892 |
| rs7561798  | G | A | 0.04    | 0.014027 | 0.482171 | 0.451178 | 2.77E-08 | 0.833147 | 0.0072 | 0.066582 |
| rs7572970  | G | A | 0.059   | 0.010258 | 0.722047 | 0.795966 | 1.19E-11 | 0.900016 | 0.0087 | 0.081644 |
| rs7651090  | G | A | 0.1204  | 0.081786 | 0.313377 | 0.307752 | 1.59E-56 | 0.252597 | 0.0076 | 0.071488 |
| rs7674212  | T | G | -0.0465 | -0.06392 | 0.408864 | 0.424876 | 5.65E-10 | 0.338788 | 0.0075 | 0.066822 |
| rs7685296  | T | C | -0.0511 | -0.00889 | 0.279365 | 0.293024 | 2.81E-10 | 0.902386 | 0.0081 | 0.072493 |
| rs77258096 | A | C | -0.1171 | 0.088635 | 0.101383 | 0.096907 | 2.36E-18 | 0.424968 | 0.0134 | 0.111094 |
| rs7729395  | T | C | 0.1373  | -0.09357 | 0.050941 | 0.056246 | 9.38E-18 | 0.515788 | 0.016  | 0.143987 |
| rs7756992  | G | A | 0.1297  | 0.010775 | 0.266896 | 0.333692 | 4.35E-62 | 0.877541 | 0.0078 | 0.069926 |
| rs7786095  | G | A | -0.0743 | 0.124982 | 0.10386  | 0.057158 | 8.43E-09 | 0.375245 | 0.0129 | 0.140953 |
| rs780094   | C | T | 0.0692  | -0.15254 | 0.612845 | 0.644155 | 8.65E-21 | 0.026545 | 0.0074 | 0.068767 |
| rs7845219  | C | T | -0.0422 | 0.083959 | 0.492786 | 0.508434 | 4.6E-09  | 0.201474 | 0.0072 | 0.065728 |
| rs7923866  | T | C | -0.0972 | -0.10038 | 0.378775 | 0.397197 | 2.07E-39 | 0.135384 | 0.0074 | 0.067225 |
| rs7929543  | C | A | 0.0828  | 0.023167 | 0.08316  | 0.074665 | 1.97E-09 | 0.853007 | 0.0138 | 0.125035 |
| rs8068804  | A | G | 0.0587  | -0.00931 | 0.325097 | 0.298791 | 5.25E-14 | 0.896812 | 0.0078 | 0.071774 |
| rs8108269  | G | T | 0.0644  | 0.039474 | 0.281015 | 0.312889 | 3.58E-16 | 0.580759 | 0.0079 | 0.071475 |
| rs825476   | T | C | 0.0524  | 0.045758 | 0.580549 | 0.595432 | 7.07E-13 | 0.494821 | 0.0073 | 0.067029 |
| rs840967   | A | C | -0.0497 | 0.071661 | 0.605922 | 0.481239 | 5.21E-10 | 0.279413 | 0.008  | 0.066252 |
| rs849135   | A | G | -0.0999 | -0.07312 | 0.499052 | 0.464349 | 8.98E-44 | 0.270115 | 0.0072 | 0.0663   |
| rs853974   | C | T | -0.0601 | 0.027202 | 0.737586 | 0.730765 | 8.52E-12 | 0.714493 | 0.0088 | 0.074356 |
| rs9369425  | A | G | -0.0546 | 0.068021 | 0.708185 | 0.688789 | 1.33E-10 | 0.339197 | 0.0085 | 0.07117  |
| rs963740   | T | A | -0.0479 | 0.02189  | 0.294299 | 0.211958 | 2.55E-08 | 0.785827 | 0.0086 | 0.080558 |
| rs982077   | G | A | -0.0453 | 0.034391 | 0.565521 | 0.431619 | 3.14E-10 | 0.604778 | 0.0072 | 0.066451 |
| rs9844972  | C | G | 0.0956  | 0.161238 | 0.069723 | 0.054145 | 1.05E-10 | 0.272043 | 0.0148 | 0.146797 |
| rs9894220  | G | A | -0.0585 | -0.10059 | 0.43374  | 0.411543 | 1.31E-13 | 0.13341  | 0.0079 | 0.067025 |
| rs993380   | G | A | -0.0507 | -0.00047 | 0.66555  | 0.598371 | 3.87E-10 | 0.994495 | 0.0081 | 0.067518 |
| rs9940149  | A | G | -0.058  | 0.090847 | 0.178556 | 0.106519 | 1.03E-09 | 0.399341 | 0.0095 | 0.107792 |

**Table S2.8 Gestational diabetes to HIV**

| SNP         | effect_allele | other_allele | beta.exposure | beta.outcome | eaf.exposure | eaf.outcome | pval.exposure | pval.outcome | se.exposure | se.outcome |
|-------------|---------------|--------------|---------------|--------------|--------------|-------------|---------------|--------------|-------------|------------|
| rs10830963  | G             | C            | 0.36289       | 0.116021     | 0.357621     | 0.35704     | 6.3309E-186   | 0.091893     | 0.012479    | 0.068835   |
| rs117195181 | T             | G            | 0.215808      | 0.342944     | 0.024815     | 0.024715    | 1.25E-08      | 0.09888      | 0.037907    | 0.207807   |
| rs12272160  | T             | A            | 0.274317      | 0.350378     | 0.019789     | 0.019551    | 2.67E-11      | 0.135992     | 0.041167    | 0.235014   |
| rs13266634  | T             | C            | -0.07624      | -0.02125     | 0.375005     | 0.375655    | 3.02E-09      | 0.754529     | 0.012855    | 0.067963   |

|            |   |   |          |          |          |          |          |          |          |          |
|------------|---|---|----------|----------|----------|----------|----------|----------|----------|----------|
| rs1333051  | T | A | -0.10919 | -0.05417 | 0.114757 | 0.114836 | 4.82E-08 | 0.60314  | 0.020005 | 0.104189 |
| rs1402837  | T | C | 0.097497 | 0.013437 | 0.170215 | 0.170702 | 1.98E-09 | 0.878475 | 0.016251 | 0.087881 |
| rs1574285  | T | G | -0.071   | -0.11283 | 0.559404 | 0.559723 | 1.17E-08 | 0.089768 | 0.012448 | 0.0665   |
| rs28624681 | T | C | -0.07776 | 0.111274 | 0.292874 | 0.293005 | 1.74E-08 | 0.125327 | 0.013797 | 0.072596 |
| rs34872471 | C | T | 0.163438 | -0.06184 | 0.202374 | 0.202337 | 3.11E-27 | 0.454972 | 0.01512  | 0.082772 |
| rs3806155  | T | A | 0.18212  | -0.02179 | 0.054226 | 0.054663 | 4.2E-12  | 0.879803 | 0.026279 | 0.144106 |
| rs6538804  | G | C | -0.08072 | -0.06417 | 0.355542 | 0.354986 | 6.55E-10 | 0.353475 | 0.01307  | 0.069163 |
| rs76349839 | C | A | -0.20829 | 0.205629 | 0.034094 | 0.033593 | 7.37E-09 | 0.257728 | 0.036024 | 0.181687 |
| rs76895963 | G | T | -0.26305 | -0.0808  | 0.030217 | 0.030254 | 3.95E-11 | 0.677524 | 0.039822 | 0.194293 |
| rs7766070  | A | C | 0.099297 | 0.013468 | 0.333012 | 0.33302  | 2.19E-14 | 0.847354 | 0.012999 | 0.069967 |
| rs780094   | C | T | 0.10462  | -0.15254 | 0.644949 | 0.644155 | 1.29E-15 | 0.026545 | 0.013085 | 0.068767 |
| rs7953129  | G | T | 0.075586 | 0.007127 | 0.341983 | 0.341887 | 6.5E-09  | 0.918719 | 0.013024 | 0.069843 |
| rs9285019  | T | C | -0.14666 | -0.02692 | 0.316265 | 0.315254 | 1.57E-27 | 0.702825 | 0.01349  | 0.070552 |

**Table S2.9 HIV to Glycated hemoglobin**

| SNP         | effect_allele | other_allele | beta.exposure | beta.outcome | eaf.exposure | eaf.outcome | pval.exposure | pval.outcome | se.exposure | se.outcome |
|-------------|---------------|--------------|---------------|--------------|--------------|-------------|---------------|--------------|-------------|------------|
| rs10483438  | C             | T            | -0.346676     | 0.0027       | 0.228859     | 0.30472     | 0.0000215     | 0.0025       | 0.0815865   | 0.2844     |
| rs11229056  | T             | G            | 0.648557      | 0.0053       | 0.0291343    | 0.024647    | 0.0000394     | 0.0077       | 0.157768    | 0.4929     |
| rs112847906 | T             | C            | 1.23293       | 0.0056       | 0.00536824   | 0.02778     | 0.0000269     | 0.0072       | 0.293678    | 0.4342     |
| rs113042452 | A             | G            | 0.541512      | -0.006       | 0.0437173    | 0.034891    | 0.000049      | 0.0064       | 0.133366    | 0.3482     |
| rs113730997 | G             | A            | -1.02842      | -0.0072      | 0.0325033    | 0.030318    | 0.0000406     | 0.0069       | 0.250599    | 0.2967     |
| rs114739803 | T             | C            | 0.949324      | -0.0118      | 0.0104438    | 0.025361    | 0.0000483     | 0.0077       | 0.233599    | 0.1281     |
| rs115495781 | A             | G            | 0.462521      | -0.0023      | 0.0691068    | 0.055668    | 0.0000269     | 0.005        | 0.110176    | 0.6483     |
| rs117080829 | T             | C            | -0.6626       | 0.0061       | 0.0609806    | 0.072436    | 0.000043      | 0.0044       | 0.16198     | 0.1716     |
| rs1269355   | G             | A            | 0.3553        | 0.003        | 0.799566     | 0.774168228 | 0.0000323     | 0.0024       | 0.0854791   | 0.2141     |
| rs139924614 | G             | A            | 1.03417       | -0.0051      | 0.00814016   | 0.041378    | 0.0000394     | 0.0058       | 0.251569    | 0.3756     |
| rs140234654 | T             | G            | 0.815413      | -0.006       | 0.0218436    | 0.012332    | 0.00000376    | 0.0109       | 0.176344    | 0.5831     |
| rs140494927 | C             | T            | 1.33385       | -0.0097      | 0.0050634    | 0.02462     | 0.0000102     | 0.0075       | 0.302286    | 0.1937     |
| rs142210987 | T             | G            | 0.620235      | 0.0037       | 0.0383448    | 0.032019    | 0.0000129     | 0.0071       | 0.142171    | 0.6068     |
| rs147007683 | G             | A            | 0.758806      | 0.0302       | 0.0203312    | 0.020759    | 0.0000364     | 0.0085       | 0.183774    | 0.0004122  |
| rs150909589 | C             | T            | 1.03731       | -0.0208      | 0.00982863   | 0.011434    | 0.00000479    | 0.0115       | 0.226791    | 0.06976    |
| rs1532480   | T             | G            | -0.286738     | 1.00E-04     | 0.639061     | 0.596892062 | 0.0000123     | 0.0022       | 0.0655862   | 0.9592     |
| rs17269691  | A             | G            | -0.579216     | 0.0047       | 0.0809933    | 0.057244    | 0.0000282     | 0.0049       | 0.138328    | 0.3419     |
| rs17453643  | A             | G            | -0.879171     | -0.0024      | 0.04056      | 0.039972    | 0.0000428     | 0.0059       | 0.214874    | 0.6816     |

|             |   |   |           |           |            |             |            |        |           |         |
|-------------|---|---|-----------|-----------|------------|-------------|------------|--------|-----------|---------|
| rs192920181 | A | G | 1.11738   | 0.0063    | 0.00718895 | 0.012719    | 0.0000309  | 0.0111 | 0.268164  | 0.571   |
| rs2412693   | G | A | 0.29924   | -5.00E-04 | 0.229913   | 0.226151963 | 0.0000386  | 0.0025 | 0.0727046 | 0.8345  |
| rs260650    | C | T | 0.261992  | 0.0012    | 0.452969   | 0.432415932 | 0.0000424  | 0.0021 | 0.0639943 | 0.5474  |
| rs35124027  | T | C | -0.343262 | -0.0082   | 0.214534   | 0.13212     | 0.0000471  | 0.0037 | 0.0843488 | 0.02759 |
| rs3814845   | G | C | -0.523701 | 1.00E-04  | 0.094333   | 0.077282508 | 0.0000263  | 0.0037 | 0.124594  | 0.9883  |
| rs6007065   | C | A | 0.902825  | 0.0023    | 0.0118176  | 0.040223    | 0.0000397  | 0.0058 | 0.219707  | 0.691   |
| rs61754819  | T | C | 1.84956   | 0.0119    | 0.00174539 | 0.012492    | 0.00000579 | 0.0106 | 0.407936  | 0.2604  |
| rs73094200  | A | C | 0.784236  | -0.001    | 0.0189967  | 0.035499    | 0.0000304  | 0.0063 | 0.18806   | 0.8692  |
| rs75697108  | G | T | -0.578206 | -4.00E-04 | 0.0846829  | 0.12121     | 0.0000169  | 0.0036 | 0.134396  | 0.9164  |
| rs77097822  | C | T | 0.336696  | 0.004     | 0.162433   | 0.10578     | 0.0000319  | 0.0039 | 0.0809455 | 0.314   |
| rs7773195   | G | A | -0.394714 | -0.001    | 0.870358   | 0.89274     | 0.00000496 | 0.0037 | 0.0864338 | 0.7919  |
| rs782082    | G | A | -0.289045 | -0.0035   | 0.720911   | 0.740997995 | 0.0000325  | 0.0024 | 0.0695615 | 0.1327  |
| rs78431500  | C | G | 0.775123  | -0.0059   | 0.0191092  | 0.018017    | 0.0000283  | 0.009  | 0.185133  | 0.5122  |
| rs79588892  | T | A | 0.475928  | 8.00E-04  | 0.0781947  | 0.07990836  | 0.00000527 | 0.0039 | 0.104516  | 0.834   |
| rs80199944  | T | C | 0.974791  | -0.0047   | 0.0111053  | 0.013612    | 0.000016   | 0.0101 | 0.22595   | 0.6401  |
| rs9814925   | C | T | -0.265374 | -0.0021   | 0.566191   | 0.569856495 | 0.0000354  | 0.002  | 0.0641716 | 0.3133  |

**Table S2.10 Glycated hemoglobin to HIV**

| SNP        | effect_allele | other_allele | beta.exposure | beta.outcome | eaf.exposure | eaf.outcome | pval.exposure | pval.outcome | se.exposure | se.outcome |
|------------|---------------|--------------|---------------|--------------|--------------|-------------|---------------|--------------|-------------|------------|
| rs10021157 | A             | G            | -0.0179       | -0.14374     | 0.447155     | 0.351628    | 1.54E-17      | 0.037553     | 0.0021      | 0.069113   |
| rs10047488 | C             | G            | 0.0262        | -0.12408     | 0.081739     | 0.103428    | 4.43E-10      | 0.252294     | 0.0042      | 0.108384   |
| rs10053046 | G             | A            | 0.0164        | -0.06225     | 0.32885      | 0.330758    | 9.02E-14      | 0.373981     | 0.0022      | 0.07002    |
| rs10169613 | T             | C            | -0.0138       | 0.072467     | 0.461234     | 0.446764    | 5.2E-12       | 0.273758     | 0.002       | 0.066214   |
| rs10184004 | T             | C            | -0.014        | 0.025538     | 0.350666     | 0.359405    | 1.97E-10      | 0.710284     | 0.0022      | 0.068749   |
| rs10205222 | G             | A            | 0.0241        | -0.07953     | 0.138488     | 0.139268    | 9.54E-17      | 0.399957     | 0.0029      | 0.094483   |
| rs10278905 | A             | G            | -0.0131       | 0.05175      | 0.632641     | 0.635774    | 4.43E-10      | 0.45098      | 0.0021      | 0.068654   |
| rs10407429 | A             | G            | -0.0233       | -0.12105     | 0.392504     | 0.439816    | 1.32E-28      | 0.068217     | 0.0021      | 0.066381   |
| rs10476553 | C             | G            | -0.0175       | -0.02645     | 0.28524      | 0.315133    | 2.56E-12      | 0.707736     | 0.0025      | 0.070557   |
| rs10501320 | C             | G            | -0.0269       | 0.138818     | 0.21937      | 0.181322    | 4.36E-25      | 0.10527      | 0.0026      | 0.0857     |
| rs1051470  | C             | T            | -0.0151       | -0.04578     | 0.601394     | 0.593947    | 6.46E-13      | 0.497475     | 0.0021      | 0.067473   |
| rs10736269 | C             | T            | -0.013        | 0.017686     | 0.460421     | 0.444671    | 8.03E-11      | 0.790524     | 0.002       | 0.066582   |
| rs10771369 | C             | G            | -0.0234       | 0.041449     | 0.21543      | 0.173743    | 1.84E-22      | 0.632986     | 0.0024      | 0.086799   |
| rs1078308  | C             | A            | -0.018        | -0.08393     | 0.77265      | 0.73019     | 4.42E-12      | 0.258705     | 0.0026      | 0.074307   |

|             |   |   |         |          |          |          |             |          |        |          |
|-------------|---|---|---------|----------|----------|----------|-------------|----------|--------|----------|
| rs10786728  | G | C | 0.0163  | -0.06199 | 0.146818 | 0.079549 | 0.000000019 | 0.615375 | 0.0029 | 0.123387 |
| rs10811660  | A | G | -0.048  | -0.08677 | 0.217241 | 0.14259  | 3.7E-82     | 0.359773 | 0.0025 | 0.094746 |
| rs10828964  | T | C | -0.0157 | -0.01585 | 0.28358  | 0.229195 | 1.56E-09    | 0.839418 | 0.0026 | 0.078231 |
| rs10830963  | G | C | 0.0528  | 0.116021 | 0.300661 | 0.35704  | 2.7808E-127 | 0.091893 | 0.0022 | 0.068835 |
| rs10873398  | A | G | -0.0216 | 0.098825 | 0.553804 | 0.63371  | 5.93E-21    | 0.149754 | 0.0023 | 0.068609 |
| rs10890333  | C | T | -0.0193 | -0.05564 | 0.30286  | 0.274683 | 1.16E-14    | 0.451596 | 0.0025 | 0.073915 |
| rs10998673  | C | G | 0.0586  | 0.139469 | 0.053603 | 0.031318 | 1.48E-30    | 0.466775 | 0.0051 | 0.191648 |
| rs11042852  | G | A | 0.0399  | -0.03042 | 0.086798 | 0.104534 | 2.21E-22    | 0.775915 | 0.0041 | 0.106852 |
| rs11046171  | C | T | -0.0143 | 0.065995 | 0.216844 | 0.345521 | 1.07E-08    | 0.342317 | 0.0025 | 0.069498 |
| rs1108646   | G | A | -0.0299 | 0.031617 | 0.594387 | 0.639509 | 1.22E-38    | 0.645885 | 0.0023 | 0.06881  |
| rs11130982  | G | T | 0.0163  | 0.024407 | 0.70908  | 0.701587 | 7.03E-11    | 0.734522 | 0.0025 | 0.071973 |
| rs11145377  | A | T | 0.0338  | -0.01285 | 0.21151  | 0.192144 | 1.5E-33     | 0.878504 | 0.0028 | 0.084046 |
| rs111631066 | A | G | -0.071  | -0.11066 | 0.015506 | 0.064284 | 1.41E-13    | 0.408563 | 0.0096 | 0.133902 |
| rs11166458  | T | A | -0.0124 | -0.00564 | 0.355425 | 0.337244 | 1.74E-08    | 0.936147 | 0.0022 | 0.0704   |
| rs11187138  | G | A | -0.0284 | -0.09421 | 0.460569 | 0.476552 | 1.13E-41    | 0.152511 | 0.0021 | 0.065848 |
| rs111934043 | C | G | 0.0166  | -0.02394 | 0.141451 | 0.240255 | 3.14E-08    | 0.755442 | 0.003  | 0.076862 |
| rs11195508  | G | C | -0.0177 | 0.074122 | 0.14979  | 0.14885  | 3.18E-08    | 0.42751  | 0.0032 | 0.093416 |
| rs111978523 | G | A | 0.0167  | -0.00281 | 0.13609  | 0.112636 | 0.000000026 | 0.97843  | 0.003  | 0.103919 |
| rs1121980   | A | G | 0.0233  | -0.02573 | 0.390088 | 0.42879  | 1.32E-28    | 0.699045 | 0.0021 | 0.06654  |
| rs112414002 | T | C | 0.0417  | 0.236769 | 0.025648 | 0.030232 | 1.11E-08    | 0.223329 | 0.0073 | 0.194435 |
| rs11257655  | T | C | 0.0341  | -0.13568 | 0.250344 | 0.264877 | 8.13E-46    | 0.07133  | 0.0024 | 0.075238 |
| rs113080138 | G | C | -0.0153 | -0.07304 | 0.24351  | 0.219921 | 1.46E-08    | 0.361057 | 0.0027 | 0.079969 |
| rs113809617 | G | C | -0.0379 | -0.05786 | 0.134677 | 0.116298 | 1.38E-36    | 0.591579 | 0.003  | 0.107845 |
| rs114322470 | G | T | -0.0538 | -0.53712 | 0.019319 | 0.023424 | 2.46E-10    | 0.012454 | 0.0085 | 0.214933 |
| rs114526150 | G | T | 0.0527  | 0.148024 | 0.02115  | 0.042275 | 4.47E-11    | 0.361518 | 0.008  | 0.162222 |
| rs11512059  | T | C | 0.0273  | 0.307039 | 0.082987 | 0.068431 | 8.03E-11    | 0.018552 | 0.0042 | 0.13041  |
| rs11602873  | T | A | -0.0353 | 0.000796 | 0.136964 | 0.23816  | 5.8E-32     | 0.991799 | 0.003  | 0.077474 |
| rs11616380  | T | G | -0.0173 | -0.00207 | 0.284921 | 0.293964 | 3.73E-15    | 0.977264 | 0.0022 | 0.072543 |
| rs11657180  | A | G | -0.0248 | -0.13825 | 0.099589 | 0.106093 | 5.68E-14    | 0.197343 | 0.0033 | 0.107242 |
| rs11708067  | G | A | -0.0524 | 0.07286  | 0.203418 | 0.169691 | 6.68E-84    | 0.405832 | 0.0027 | 0.087651 |
| rs11728350  | G | A | 0.0279  | 0.07065  | 0.105557 | 0.158208 | 2.29E-16    | 0.431857 | 0.0034 | 0.089883 |
| rs117370443 | C | T | 0.0553  | 0.052516 | 0.039128 | 0.062853 | 7.06E-21    | 0.701103 | 0.0059 | 0.13682  |
| rs1175550   | G | A | -0.0422 | 0.005777 | 0.23081  | 0.277047 | 2.5E-51     | 0.937473 | 0.0028 | 0.073638 |
| rs117679105 | T | C | -0.1311 | -0.01856 | 0.027085 | 0.012607 | 3.97E-76    | 0.950629 | 0.0071 | 0.29979  |
| rs117709065 | T | C | -0.0805 | 0.006991 | 0.017646 | 0.008286 | 9.06E-19    | 0.98497  | 0.0091 | 0.371083 |

|             |   |   |         |          |          |          |             |          |        |          |
|-------------|---|---|---------|----------|----------|----------|-------------|----------|--------|----------|
| rs11917973  | T | C | -0.0153 | -0.05861 | 0.403915 | 0.423645 | 3.54E-12    | 0.382092 | 0.0022 | 0.067054 |
| rs12147688  | T | G | 0.0215  | 0.080115 | 0.25723  | 0.232225 | 1.35E-16    | 0.306958 | 0.0026 | 0.078419 |
| rs1234212   | T | C | 0.0125  | -0.02903 | 0.370691 | 0.336854 | 2.64E-09    | 0.677044 | 0.0021 | 0.069711 |
| rs12365580  | A | G | -0.0257 | -0.12478 | 0.170789 | 0.107287 | 1.76E-21    | 0.244684 | 0.0027 | 0.107262 |
| rs12426239  | T | C | -0.0186 | 0.046095 | 0.141002 | 0.144699 | 5.65E-10    | 0.622742 | 0.003  | 0.093694 |
| rs12450826  | T | A | -0.0276 | -0.06485 | 0.29219  | 0.317078 | 2.53E-26    | 0.360548 | 0.0026 | 0.070924 |
| rs12492391  | A | C | 0.0142  | 0.047616 | 0.35379  | 0.358686 | 3.29E-09    | 0.488812 | 0.0024 | 0.068789 |
| rs12600858  | A | G | -0.0226 | 0.044303 | 0.305598 | 0.260164 | 4.66E-21    | 0.55589  | 0.0024 | 0.075222 |
| rs1260326   | C | T | 0.0223  | -0.11301 | 0.578888 | 0.650295 | 2.43E-26    | 0.101945 | 0.0021 | 0.069096 |
| rs12670684  | G | A | -0.0461 | 0.040478 | 0.080097 | 0.120318 | 4.97E-28    | 0.687836 | 0.0042 | 0.100743 |
| rs1271040   | G | A | 0.0258  | 0.08297  | 0.35081  | 0.34684  | 5.93E-27    | 0.230529 | 0.0024 | 0.069199 |
| rs12748814  | T | C | 0.0258  | 0.128919 | 0.085378 | 0.125918 | 3.12E-10    | 0.190614 | 0.0041 | 0.098504 |
| rs12768808  | G | A | 0.0117  | 0.037078 | 0.373171 | 0.302136 | 2.53E-08    | 0.607276 | 0.0021 | 0.072141 |
| rs12775642  | A | G | 0.0125  | -0.0838  | 0.301273 | 0.320708 | 5.49E-08    | 0.238105 | 0.0023 | 0.071029 |
| rs12780892  | G | C | -0.0334 | -0.0177  | 0.23645  | 0.139719 | 3.78E-35    | 0.853302 | 0.0027 | 0.095733 |
| rs1278769   | G | A | 0.0152  | -0.05192 | 0.760367 | 0.759453 | 2.4E-10     | 0.503607 | 0.0024 | 0.077621 |
| rs12876143  | C | T | 0.0809  | -0.00422 | 0.07549  | 0.046524 | 5.9E-91     | 0.978614 | 0.004  | 0.157492 |
| rs12912777  | T | C | 0.0214  | 0.021562 | 0.12668  | 0.103317 | 9.7E-10     | 0.841913 | 0.0035 | 0.108111 |
| rs13167071  | C | G | 0.0194  | 0.00361  | 0.686963 | 0.668176 | 3.32E-17    | 0.958985 | 0.0023 | 0.070196 |
| rs13192435  | C | T | 0.0522  | -0.26183 | 0.025466 | 0.019209 | 8.63E-13    | 0.282681 | 0.0073 | 0.243713 |
| rs13199088  | T | C | -0.022  | -0.00809 | 0.26649  | 0.291527 | 2.64E-17    | 0.910911 | 0.0026 | 0.072326 |
| rs13266634  | T | C | -0.0527 | -0.02125 | 0.325994 | 0.375655 | 5.6057E-139 | 0.754529 | 0.0021 | 0.067963 |
| rs13431652  | C | T | -0.0853 | 0.004089 | 0.272117 | 0.310645 | 1.1176E-276 | 0.954488 | 0.0024 | 0.071649 |
| rs1399627   | G | A | 0.022   | -0.07625 | 0.697733 | 0.640295 | 1.12E-21    | 0.26913  | 0.0023 | 0.068996 |
| rs142513102 | G | A | -0.0718 | -0.03164 | 0.026358 | 0.003064 | 2.02E-23    | 0.956114 | 0.0072 | 0.574968 |
| rs1434602   | C | T | 0.0204  | -0.17136 | 0.88246  | 0.897051 | 1.46E-08    | 0.117057 | 0.0036 | 0.109336 |
| rs145496147 | T | C | -0.0731 | -0.05745 | 0.012021 | 0.020419 | 5.34E-12    | 0.805139 | 0.0106 | 0.23289  |
| rs145892119 | T | C | -0.03   | -0.0704  | 0.074451 | 0.028134 | 9.22E-12    | 0.727405 | 0.0044 | 0.201963 |
| rs1481012   | G | A | 0.0235  | 0.057854 | 0.143817 | 0.074877 | 5.34E-16    | 0.641682 | 0.0029 | 0.124323 |
| rs148303016 | T | C | 0.0368  | 0.095615 | 0.052972 | 0.044971 | 1.47E-12    | 0.553135 | 0.0052 | 0.16122  |
| rs1490384   | T | C | 0.0179  | -0.04521 | 0.582663 | 0.477651 | 7.1E-15     | 0.49414  | 0.0023 | 0.066122 |
| rs149142833 | T | C | 0.0246  | -0.0584  | 0.133427 | 0.16254  | 2.1E-15     | 0.513516 | 0.0031 | 0.089383 |
| rs149336329 | T | G | -0.0444 | 0.243971 | 0.048623 | 0.024415 | 3.49E-21    | 0.247155 | 0.0047 | 0.210813 |
| rs1496653   | G | A | -0.0194 | 0.084638 | 0.195708 | 0.311024 | 8.55E-14    | 0.234911 | 0.0026 | 0.071256 |
| rs150705486 | A | G | -0.2964 | 0.344173 | 0.015663 | 0.008361 | 1.0654E-213 | 0.35515  | 0.0095 | 0.372221 |

|             |   |   |         |          |          |          |             |          |        |          |
|-------------|---|---|---------|----------|----------|----------|-------------|----------|--------|----------|
| rs1524518   | A | G | 0.0172  | -0.07233 | 0.250974 | 0.257647 | 7.53E-14    | 0.34043  | 0.0023 | 0.075868 |
| rs1560980   | C | G | 0.0468  | 0.07236  | 0.041462 | 0.016824 | 7.09E-16    | 0.775686 | 0.0058 | 0.253943 |
| rs1564648   | A | G | 0.0116  | 0.045688 | 0.451296 | 0.512396 | 3.32E-08    | 0.487884 | 0.0021 | 0.065863 |
| rs1641523   | T | C | -0.0245 | -0.00735 | 0.535411 | 0.593083 | 1.89E-31    | 0.912846 | 0.0021 | 0.067166 |
| rs165975    | C | T | 0.0162  | -0.04352 | 0.26198  | 0.301602 | 1.87E-12    | 0.544377 | 0.0023 | 0.07179  |
| rs16829945  | T | C | -0.0143 | 0.086814 | 0.286873 | 0.280945 | 5.05E-10    | 0.233456 | 0.0023 | 0.072861 |
| rs17080069  | G | A | 0.0238  | 0.044863 | 0.065946 | 0.076694 | 1.46E-08    | 0.715502 | 0.0042 | 0.12309  |
| rs1708302   | T | C | -0.0265 | -0.07344 | 0.415368 | 0.464311 | 1.03E-30    | 0.267937 | 0.0023 | 0.06629  |
| rs17101394  | A | G | 0.0206  | 0.071455 | 0.1429   | 0.134423 | 6.57E-12    | 0.466044 | 0.003  | 0.098027 |
| rs17168486  | T | C | 0.0239  | -0.04744 | 0.213054 | 0.198118 | 1.18E-21    | 0.565094 | 0.0025 | 0.082461 |
| rs17419291  | C | T | -0.0245 | 0.04689  | 0.087057 | 0.045601 | 2.29E-09    | 0.769269 | 0.0041 | 0.159852 |
| rs17462188  | T | C | 0.0146  | -0.12827 | 0.66393  | 0.69308  | 3.22E-11    | 0.073819 | 0.0022 | 0.071749 |
| rs17850433  | C | T | 0.0938  | 0.169035 | 0.011927 | 0.005149 | 8.83E-19    | 0.704116 | 0.0106 | 0.445095 |
| rs1787663   | A | C | 0.0141  | -0.10285 | 0.279923 | 0.143448 | 8.76E-10    | 0.279196 | 0.0023 | 0.095042 |
| rs1800562   | A | G | -0.1248 | 0.088827 | 0.078843 | 0.03711  | 3.3484E-185 | 0.616071 | 0.0043 | 0.177149 |
| rs182969725 | G | A | -0.0734 | 0.370054 | 0.011294 | 0.006591 | 3.78E-11    | 0.345799 | 0.0111 | 0.392519 |
| rs1831382   | C | T | -0.0249 | -0.14266 | 0.676751 | 0.594055 | 1.07E-29    | 0.033578 | 0.0022 | 0.067131 |
| rs183794109 | T | C | 0.017   | 0.018488 | 0.29894  | 0.238964 | 1.05E-11    | 0.812061 | 0.0025 | 0.077755 |
| rs1838931   | T | C | 0.0139  | 0.047526 | 0.350528 | 0.301296 | 2.65E-10    | 0.507126 | 0.0022 | 0.071649 |
| rs1975283   | C | A | -0.0236 | 0.103115 | 0.708937 | 0.637938 | 1.06E-24    | 0.135878 | 0.0023 | 0.069143 |
| rs198325    | T | C | -0.025  | -0.00329 | 0.191086 | 0.192827 | 2.06E-20    | 0.968701 | 0.0027 | 0.083928 |
| rs2044341   | C | T | -0.0527 | -0.10544 | 0.68405  | 0.671225 | 1.21E-98    | 0.133309 | 0.0025 | 0.070239 |
| rs2060985   | G | A | -0.0159 | 0.160628 | 0.548997 | 0.434472 | 1.87E-15    | 0.015714 | 0.002  | 0.0665   |
| rs2068888   | A | G | -0.0141 | 0.010564 | 0.477685 | 0.469827 | 1.79E-12    | 0.872519 | 0.002  | 0.065833 |
| rs2106844   | A | T | 0.0123  | -0.04148 | 0.656985 | 0.629389 | 2.26E-08    | 0.544717 | 0.0022 | 0.068475 |
| rs2113260   | C | T | -0.018  | 0.04879  | 0.707436 | 0.719855 | 5.03E-15    | 0.509252 | 0.0023 | 0.073925 |
| rs2143923   | G | A | -0.0229 | 0.052394 | 0.566021 | 0.557609 | 1.09E-27    | 0.429145 | 0.0021 | 0.066266 |
| rs2236498   | C | A | -0.0217 | -0.0559  | 0.251818 | 0.217174 | 1.54E-19    | 0.479961 | 0.0024 | 0.079137 |
| rs2237895   | C | A | 0.0311  | 0.016665 | 0.407846 | 0.511592 | 1.27E-49    | 0.802389 | 0.0021 | 0.066592 |
| rs2240716   | T | C | 0.0122  | 0.069426 | 0.291594 | 0.379347 | 2.93E-08    | 0.305497 | 0.0022 | 0.067752 |
| rs2267716   | C | T | -0.0145 | -0.03944 | 0.227714 | 0.221539 | 1.53E-09    | 0.620216 | 0.0024 | 0.079587 |
| rs2293476   | C | G | 0.0217  | 0.018934 | 0.215285 | 0.2127   | 3.96E-18    | 0.812796 | 0.0025 | 0.079952 |
| rs2299421   | G | C | -0.0124 | -0.03268 | 0.325566 | 0.303376 | 1.74E-08    | 0.64698  | 0.0022 | 0.071369 |
| rs2304442   | A | T | 0.0365  | -0.09507 | 0.149415 | 0.205091 | 2.51E-36    | 0.245229 | 0.0029 | 0.081816 |
| rs2305196   | A | G | -0.0267 | -0.00978 | 0.324952 | 0.21982  | 6.78E-34    | 0.90291  | 0.0022 | 0.080169 |

|            |   |   |         |          |          |          |             |          |        |          |
|------------|---|---|---------|----------|----------|----------|-------------|----------|--------|----------|
| rs2325747  | T | C | -0.0124 | 0.055298 | 0.476515 | 0.406849 | 3.53E-09    | 0.40984  | 0.0021 | 0.067095 |
| rs235924   | C | T | 0.0317  | -0.06003 | 0.696345 | 0.554069 | 3.24E-43    | 0.364956 | 0.0023 | 0.066262 |
| rs247826   | T | C | 0.0226  | -0.10247 | 0.212027 | 0.289922 | 1.57E-19    | 0.159603 | 0.0025 | 0.072856 |
| rs2512539  | T | G | -0.0194 | -0.04908 | 0.13912  | 0.196091 | 4.13E-09    | 0.556937 | 0.0033 | 0.083557 |
| rs2546197  | G | T | 0.0238  | -0.14714 | 0.077777 | 0.07996  | 3.11E-08    | 0.223576 | 0.0043 | 0.120899 |
| rs2612059  | C | A | 0.024   | -0.01119 | 0.174305 | 0.136159 | 6.17E-19    | 0.907041 | 0.0027 | 0.095789 |
| rs2641443  | A | G | -0.0139 | 0.105927 | 0.274765 | 0.321328 | 1.51E-09    | 0.133258 | 0.0023 | 0.070553 |
| rs2748427  | G | A | 0.0718  | 0.051005 | 0.213709 | 0.20299  | 2.1471E-181 | 0.535856 | 0.0025 | 0.082387 |
| rs28413704 | G | A | -0.0201 | -0.00727 | 0.116351 | 0.042984 | 8.94E-11    | 0.96444  | 0.0031 | 0.163052 |
| rs28526689 | A | G | 0.0142  | -0.00189 | 0.312914 | 0.385376 | 1.09E-10    | 0.977739 | 0.0022 | 0.067699 |
| rs2858010  | C | T | -0.0218 | -0.06046 | 0.385281 | 0.263762 | 3.03E-25    | 0.424406 | 0.0021 | 0.075685 |
| rs28628339 | G | A | 0.023   | 0.054643 | 0.29155  | 0.247051 | 3.58E-20    | 0.475566 | 0.0025 | 0.07659  |
| rs28641468 | C | T | 0.033   | -0.09197 | 0.776288 | 0.699448 | 8.77E-40    | 0.200092 | 0.0025 | 0.07178  |
| rs28695210 | A | G | 0.0395  | 0.140669 | 0.082338 | 0.075464 | 4.08E-20    | 0.263693 | 0.0043 | 0.125855 |
| rs2954032  | G | A | 0.0146  | -0.0288  | 0.6903   | 0.735283 | 3.22E-11    | 0.698807 | 0.0022 | 0.074438 |
| rs33978622 | C | G | -0.025  | 0.061063 | 0.33313  | 0.364063 | 1.52E-23    | 0.372727 | 0.0025 | 0.068504 |
| rs34811474 | A | G | -0.0159 | 0.014501 | 0.23194  | 0.229378 | 3.89E-09    | 0.853214 | 0.0027 | 0.078374 |
| rs348330   | A | G | -0.0193 | -0.00241 | 0.574124 | 0.644812 | 1.74E-18    | 0.972218 | 0.0022 | 0.069183 |
| rs34872471 | C | T | 0.0709  | -0.06184 | 0.24946  | 0.202337 | 6.3013E-177 | 0.454972 | 0.0025 | 0.082772 |
| rs34878143 | C | T | -0.0579 | 0.020886 | 0.020365 | 0.048699 | 1.16E-14    | 0.890418 | 0.0075 | 0.151593 |
| rs35018839 | G | A | -0.0194 | 0.158093 | 0.105758 | 0.132716 | 4.13E-09    | 0.10366  | 0.0033 | 0.097147 |
| rs35188965 | T | C | 0.0153  | 0.021619 | 0.521328 | 0.622424 | 3.2E-13     | 0.750577 | 0.0021 | 0.068009 |
| rs351978   | G | A | -0.0138 | 0.079515 | 0.563672 | 0.658426 | 4.98E-11    | 0.254114 | 0.0021 | 0.069725 |
| rs35585881 | A | G | 0.0201  | 0.096455 | 0.090454 | 0.053796 | 9.31E-09    | 0.510438 | 0.0035 | 0.146553 |
| rs35662301 | C | T | 0.021   | -0.15605 | 0.115998 | 0.117648 | 1.25E-11    | 0.12519  | 0.0031 | 0.101771 |
| rs35895680 | A | C | -0.0145 | -0.07011 | 0.275594 | 0.309826 | 1.53E-09    | 0.327456 | 0.0024 | 0.071594 |
| rs3748059  | G | A | -0.0204 | 0.086253 | 0.804083 | 0.759265 | 4.29E-15    | 0.265532 | 0.0026 | 0.077467 |
| rs3757972  | T | C | 0.0182  | 0.007252 | 0.387452 | 0.282994 | 4.45E-18    | 0.922311 | 0.0021 | 0.074356 |
| rs3810027  | G | C | 0.0128  | 0.032255 | 0.356272 | 0.38337  | 1.09E-09    | 0.633662 | 0.0021 | 0.06768  |
| rs3811444  | T | C | 0.0222  | 0.034503 | 0.30854  | 0.346384 | 6.06E-24    | 0.620189 | 0.0022 | 0.069621 |
| rs3827181  | T | C | 0.0163  | 0.011181 | 0.387618 | 0.259356 | 8.37E-15    | 0.88226  | 0.0021 | 0.075495 |
| rs3857286  | T | C | -0.0133 | -0.03043 | 0.695215 | 0.708535 | 1.49E-09    | 0.676578 | 0.0022 | 0.072957 |
| rs3918296  | G | C | -0.0476 | -0.20529 | 0.024434 | 0.005471 | 1.21E-12    | 0.649847 | 0.0067 | 0.452212 |
| rs4133213  | A | C | -0.0116 | 0.015033 | 0.442993 | 0.312781 | 3.32E-08    | 0.833876 | 0.0021 | 0.071675 |
| rs4238013  | T | C | -0.0173 | 0.093173 | 0.826007 | 0.777593 | 6.47E-10    | 0.242303 | 0.0028 | 0.079686 |

|             |   |   |         |          |          |          |             |          |        |          |
|-------------|---|---|---------|----------|----------|----------|-------------|----------|--------|----------|
| rs4325403   | A | T | 0.0304  | -0.01483 | 0.262591 | 0.252623 | 9.05E-37    | 0.845506 | 0.0024 | 0.076112 |
| rs4335852   | A | G | -0.0239 | 0.043443 | 0.25155  | 0.204067 | 8.61E-19    | 0.594918 | 0.0027 | 0.081702 |
| rs4379994   | G | A | -0.0163 | 0.051455 | 0.198479 | 0.217211 | 3.63E-10    | 0.521287 | 0.0026 | 0.080227 |
| rs4435501   | C | A | 0.0209  | 0.123126 | 0.10638  | 0.209765 | 0.000000038 | 0.130256 | 0.0038 | 0.081373 |
| rs4499344   | A | G | -0.027  | -0.04079 | 0.397424 | 0.300413 | 2.32E-29    | 0.571725 | 0.0024 | 0.072121 |
| rs45607834  | T | C | 0.0228  | 0.348983 | 0.10266  | 0.06309  | 1.97E-09    | 0.010949 | 0.0038 | 0.137161 |
| rs4678408   | G | A | -0.0187 | -0.09477 | 0.638295 | 0.637745 | 5.35E-19    | 0.168444 | 0.0021 | 0.068814 |
| rs4679997   | G | C | -0.0174 | -0.01909 | 0.652693 | 0.685773 | 1.17E-16    | 0.787178 | 0.0021 | 0.070721 |
| rs4689394   | G | C | 0.018   | 0.021864 | 0.665062 | 0.582609 | 5.03E-15    | 0.743163 | 0.0023 | 0.066725 |
| rs4737010   | A | G | 0.0628  | -0.07996 | 0.267535 | 0.250443 | 3.7662E-164 | 0.296187 | 0.0023 | 0.076546 |
| rs4746838   | A | T | 0.1336  | -0.02657 | 0.926457 | 0.933835 | 1.6601E-202 | 0.843016 | 0.0044 | 0.134148 |
| rs4755309   | T | G | -0.0253 | 0.084958 | 0.11369  | 0.118548 | 2.1E-12     | 0.404268 | 0.0036 | 0.101866 |
| rs4760682   | A | C | 0.0785  | -0.00438 | 0.81301  | 0.84023  | 2.2847E-161 | 0.961231 | 0.0029 | 0.090093 |
| rs477777    | C | T | 0.0148  | 0.078915 | 0.717988 | 0.763895 | 1.24E-10    | 0.312401 | 0.0023 | 0.078118 |
| rs4792687   | C | T | -0.0219 | 0.135703 | 0.50569  | 0.597058 | 1.7E-21     | 0.043864 | 0.0023 | 0.067334 |
| rs4807455   | A | G | 0.0126  | -0.02393 | 0.276693 | 0.267557 | 0.000000043 | 0.749425 | 0.0023 | 0.074925 |
| rs4809329   | T | C | 0.0145  | 0.125357 | 0.66634  | 0.738094 | 1.53E-09    | 0.093784 | 0.0024 | 0.074806 |
| rs4809556   | A | G | -0.0165 | 0.020119 | 0.610809 | 0.55828  | 3.93E-15    | 0.762011 | 0.0021 | 0.066435 |
| rs4821030   | A | C | -0.0332 | 0.034391 | 0.067757 | 0.059294 | 2.68E-15    | 0.808108 | 0.0042 | 0.141605 |
| rs4864730   | T | C | 0.0186  | -0.07297 | 0.28543  | 0.289781 | 8.44E-13    | 0.314699 | 0.0026 | 0.07258  |
| rs4889490   | T | G | -0.0146 | -0.02164 | 0.479502 | 0.407364 | 3.22E-11    | 0.748252 | 0.0022 | 0.067416 |
| rs4901844   | T | C | -0.0237 | -0.02492 | 0.24892  | 0.279064 | 1.67E-18    | 0.736134 | 0.0027 | 0.073955 |
| rs4910498   | T | A | -0.0297 | -0.15655 | 0.59909  | 0.732952 | 2.07E-45    | 0.036209 | 0.0021 | 0.074741 |
| rs4955744   | C | A | 0.0153  | -0.02046 | 0.166374 | 0.118768 | 1.46E-08    | 0.840768 | 0.0027 | 0.101813 |
| rs5026475   | C | T | -0.012  | 0.011763 | 0.56123  | 0.53833  | 1.97E-09    | 0.858948 | 0.002  | 0.066191 |
| rs55770587  | T | C | -0.0455 | 0.102046 | 0.041923 | 0.035972 | 1.43E-15    | 0.559752 | 0.0057 | 0.174974 |
| rs55881843  | A | G | -0.0334 | -0.12609 | 0.13875  | 0.102577 | 4.45E-24    | 0.248088 | 0.0033 | 0.10917  |
| rs56317699  | C | T | 0.0151  | 0.072292 | 0.25987  | 0.286181 | 5.2E-11     | 0.321002 | 0.0023 | 0.072846 |
| rs563437995 | C | G | -0.1595 | 0.075133 | 0.007931 | 0.015    | 9.17E-32    | 0.78109  | 0.0136 | 0.27036  |
| rs56395926  | A | G | -0.016  | -0.02497 | 0.22883  | 0.355511 | 3.11E-09    | 0.718398 | 0.0027 | 0.069237 |
| rs56397034  | C | G | -0.0202 | -0.13608 | 0.34472  | 0.309476 | 4.24E-20    | 0.057232 | 0.0022 | 0.071565 |
| rs57891429  | C | T | 0.0188  | 0.090626 | 0.13181  | 0.071566 | 3.21E-08    | 0.482421 | 0.0034 | 0.129021 |
| rs59153558  | G | A | 0.0281  | 0.01067  | 0.666635 | 0.693046 | 2.33E-37    | 0.881077 | 0.0022 | 0.071319 |
| rs592423    | C | A | -0.016  | 0.052296 | 0.499297 | 0.497898 | 2.56E-14    | 0.426184 | 0.0021 | 0.06572  |
| rs6066141   | C | T | -0.0221 | 0.03062  | 0.235542 | 0.21398  | 9.57E-19    | 0.703932 | 0.0025 | 0.080576 |

|            |   |   |         |          |          |          |          |          |        |          |
|------------|---|---|---------|----------|----------|----------|----------|----------|--------|----------|
| rs6077396  | A | G | -0.0185 | -0.10342 | 0.488992 | 0.485361 | 2.24E-20 | 0.117861 | 0.002  | 0.066131 |
| rs61215894 | C | T | -0.0142 | 0.185555 | 0.55231  | 0.533826 | 3.29E-09 | 0.004322 | 0.0024 | 0.065023 |
| rs61963209 | A | G | -0.0153 | 0.005398 | 0.184949 | 0.20053  | 1.46E-08 | 0.947761 | 0.0027 | 0.08239  |
| rs62076542 | T | C | 0.0152  | 0.105873 | 0.48982  | 0.472357 | 3.88E-11 | 0.109128 | 0.0023 | 0.066083 |
| rs62084234 | G | A | 0.0167  | 0.06809  | 0.281359 | 0.239256 | 2.39E-11 | 0.377279 | 0.0025 | 0.077119 |
| rs62136856 | G | A | 0.0188  | 0.015162 | 0.71661  | 0.659045 | 5.48E-14 | 0.826946 | 0.0025 | 0.069351 |
| rs62523081 | A | G | 0.0148  | -0.07847 | 0.330763 | 0.394451 | 1.73E-11 | 0.244918 | 0.0022 | 0.067483 |
| rs62550975 | G | A | -0.0935 | 0.131728 | 0.062659 | 0.031846 | 4.62E-88 | 0.488198 | 0.0047 | 0.190035 |
| rs636089   | C | T | 0.0126  | -0.06366 | 0.387388 | 0.32884  | 1.97E-09 | 0.364564 | 0.0021 | 0.070209 |
| rs637614   | C | T | -0.0171 | 0.01221  | 0.47456  | 0.496856 | 1.05E-13 | 0.852588 | 0.0023 | 0.065708 |
| rs6459737  | A | G | -0.016  | 0.04328  | 0.380185 | 0.314964 | 2.56E-14 | 0.541755 | 0.0021 | 0.070932 |
| rs6494529  | A | G | 0.0194  | -0.05516 | 0.483007 | 0.450379 | 2.51E-20 | 0.40424  | 0.0021 | 0.066128 |
| rs6518681  | G | A | 0.0326  | -0.00086 | 0.907019 | 0.914218 | 3.64E-16 | 0.994222 | 0.004  | 0.119172 |
| rs6565922  | T | C | 0.0138  | -0.05076 | 0.403852 | 0.39893  | 4.98E-11 | 0.45128  | 0.0021 | 0.06738  |
| rs67131976 | T | C | 0.047   | -0.08582 | 0.215514 | 0.17224  | 7.55E-79 | 0.324334 | 0.0025 | 0.087074 |
| rs6731171  | A | T | 0.0154  | 0.031221 | 0.6205   | 0.620432 | 1.39E-10 | 0.645167 | 0.0024 | 0.0678   |
| rs6777684  | G | A | 0.0259  | -0.02585 | 0.60967  | 0.609528 | 3.77E-27 | 0.702724 | 0.0024 | 0.067727 |
| rs6808166  | A | G | 0.0253  | 0.073742 | 0.545587 | 0.594873 | 1.12E-36 | 0.270258 | 0.002  | 0.066888 |
| rs6810158  | C | T | -0.0288 | -0.05738 | 0.08701  | 0.085608 | 2.15E-12 | 0.627343 | 0.0041 | 0.118187 |
| rs6878122  | A | G | -0.0262 | 0.02049  | 0.73181  | 0.771809 | 9.6E-28  | 0.79501  | 0.0024 | 0.078865 |
| rs689      | T | A | -0.0218 | 0.161712 | 0.753534 | 0.789061 | 2.78E-18 | 0.047979 | 0.0025 | 0.081773 |
| rs6893283  | T | C | -0.0559 | 0.357921 | 0.01453  | 0.010321 | 5.78E-09 | 0.292563 | 0.0096 | 0.340063 |
| rs6920313  | C | T | 0.0146  | 0.030561 | 0.317744 | 0.327682 | 3.22E-11 | 0.664167 | 0.0022 | 0.07039  |
| rs6947830  | A | G | 0.0244  | -0.06188 | 0.573881 | 0.45885  | 3.3E-31  | 0.349058 | 0.0021 | 0.066078 |
| rs6973494  | A | C | 0.0164  | -0.05376 | 0.480692 | 0.574873 | 5.74E-15 | 0.420824 | 0.0021 | 0.066782 |
| rs700083   | C | T | 0.0158  | -0.11667 | 0.739449 | 0.830433 | 5.09E-08 | 0.180081 | 0.0029 | 0.087038 |
| rs7124355  | G | A | -0.019  | 0.053697 | 0.667134 | 0.564126 | 1.46E-19 | 0.418991 | 0.0021 | 0.066442 |
| rs7166540  | G | A | -0.0188 | 0.037187 | 0.23753  | 0.193427 | 3.33E-12 | 0.656236 | 0.0027 | 0.083544 |
| rs7195055  | T | C | -0.058  | 0.496873 | 0.015239 | 0.021409 | 2.24E-09 | 0.026555 | 0.0097 | 0.224019 |
| rs72638978 | C | T | -0.1419 | 0.366675 | 0.023513 | 0.007096 | 7.75E-76 | 0.328225 | 0.0077 | 0.375039 |
| rs72681698 | C | T | -0.0736 | -0.90331 | 0.011004 | 0.00185  | 2.22E-11 | 0.286965 | 0.011  | 0.84833  |
| rs72781680 | T | C | 0.0512  | -0.06792 | 0.114034 | 0.096304 | 2.74E-54 | 0.548035 | 0.0033 | 0.113067 |
| rs72802365 | C | G | -0.0281 | -0.01869 | 0.067706 | 0.079717 | 2.22E-11 | 0.877304 | 0.0042 | 0.121086 |
| rs72811487 | A | G | -0.0573 | 0.068519 | 0.035128 | 0.02972  | 2.42E-20 | 0.722454 | 0.0062 | 0.192913 |
| rs72900998 | C | T | -0.0337 | -0.2014  | 0.089458 | 0.055884 | 6.06E-22 | 0.164294 | 0.0035 | 0.144811 |

|            |   |   |         |          |          |          |             |          |        |          |
|------------|---|---|---------|----------|----------|----------|-------------|----------|--------|----------|
| rs72939920 | T | A | -0.0287 | 0.064436 | 0.195143 | 0.161406 | 2.17E-26    | 0.471901 | 0.0027 | 0.08957  |
| rs72973028 | C | A | 0.02    | 0.020222 | 0.17238  | 0.201182 | 1.11E-10    | 0.8057   | 0.0031 | 0.082212 |
| rs7298690  | C | T | 0.014   | 0.035775 | 0.213307 | 0.296275 | 2.14E-08    | 0.619866 | 0.0025 | 0.072122 |
| rs730497   | A | G | 0.0902  | -0.07516 | 0.177903 | 0.106486 | 1.029E-263  | 0.484062 | 0.0026 | 0.107407 |
| rs73061095 | G | T | 0.024   | 0.080357 | 0.319301 | 0.308026 | 1.04E-27    | 0.260981 | 0.0022 | 0.071487 |
| rs73221116 | A | G | 0.0327  | -0.24754 | 0.035638 | 0.051786 | 2.76E-09    | 0.096254 | 0.0055 | 0.148826 |
| rs73226260 | A | G | -0.0424 | 0.080082 | 0.034445 | 0.024414 | 3.47E-11    | 0.712361 | 0.0064 | 0.217209 |
| rs737092   | C | T | 0.0245  | -0.00871 | 0.48702  | 0.507417 | 1.68E-34    | 0.895109 | 0.002  | 0.066074 |
| rs74111616 | T | C | 0.0218  | 0.06446  | 0.067881 | 0.057755 | 5.04E-08    | 0.651817 | 0.004  | 0.142852 |
| rs75134025 | C | T | -0.0484 | -0.01235 | 0.023524 | 0.02814  | 1.91E-10    | 0.950333 | 0.0076 | 0.198245 |
| rs7513688  | A | G | 0.0172  | 0.116759 | 0.333601 | 0.340873 | 5.36E-15    | 0.094402 | 0.0022 | 0.069806 |
| rs7528296  | C | T | -0.0134 | 0.04633  | 0.404514 | 0.392034 | 1.76E-10    | 0.495633 | 0.0021 | 0.067995 |
| rs75629141 | A | T | -0.0309 | -0.09593 | 0.82757  | 0.905699 | 2.11E-23    | 0.40377  | 0.0031 | 0.114895 |
| rs75636043 | A | G | -0.0254 | 0.09678  | 0.078182 | 0.051543 | 3.48E-09    | 0.518343 | 0.0043 | 0.149837 |
| rs7572278  | A | T | 0.0234  | 0.154865 | 0.197136 | 0.220445 | 2.26E-19    | 0.052006 | 0.0026 | 0.0797   |
| rs7606173  | C | G | -0.024  | 0.026183 | 0.358606 | 0.373556 | 1.72E-25    | 0.701528 | 0.0023 | 0.068316 |
| rs76505278 | C | T | -0.0277 | 0.076881 | 0.10326  | 0.088397 | 3.11E-13    | 0.509564 | 0.0038 | 0.116572 |
| rs76895963 | G | T | -0.1889 | -0.0808  | 0.021026 | 0.030254 | 3.2434E-102 | 0.677524 | 0.0088 | 0.194293 |
| rs7720275  | C | T | 0.0233  | 0.040235 | 0.147638 | 0.117682 | 9.4E-16     | 0.69274  | 0.0029 | 0.101825 |
| rs7797401  | A | G | -0.0136 | -0.00015 | 0.440081 | 0.458486 | 9.41E-11    | 0.998195 | 0.0021 | 0.066595 |
| rs77981966 | T | C | -0.0726 | -0.0974  | 0.076555 | 0.032966 | 5.93E-64    | 0.602375 | 0.0043 | 0.186955 |
| rs7817540  | C | T | 0.0202  | 0.17575  | 0.39829  | 0.353757 | 6.64E-22    | 0.010822 | 0.0021 | 0.068965 |
| rs7820334  | T | C | -0.0218 | 0.075289 | 0.271713 | 0.295704 | 1.05E-19    | 0.301418 | 0.0024 | 0.072855 |
| rs78583604 | T | G | 0.0266  | 0.005176 | 0.13668  | 0.201896 | 2.96E-14    | 0.950109 | 0.0035 | 0.082728 |
| rs78588343 | A | G | -0.0321 | -0.01323 | 0.15054  | 0.218517 | 1.02E-26    | 0.868222 | 0.003  | 0.079747 |
| rs7864655  | G | T | 0.0134  | 0.069565 | 0.253724 | 0.237269 | 5.67E-09    | 0.372677 | 0.0023 | 0.078035 |
| rs79121130 | T | C | 0.0296  | 0.084117 | 0.178799 | 0.145946 | 4.99E-30    | 0.369357 | 0.0026 | 0.093705 |
| rs7944748  | G | T | 0.015   | -0.0269  | 0.339554 | 0.375853 | 9.22E-12    | 0.694368 | 0.0022 | 0.068468 |
| rs79621919 | A | G | -0.0384 | -0.13429 | 0.04856  | 0.080542 | 4.62E-15    | 0.269294 | 0.0049 | 0.121558 |
| rs79880068 | T | C | -0.0315 | 0.147427 | 0.10308  | 0.094987 | 1.14E-16    | 0.193072 | 0.0038 | 0.113271 |
| rs8013143  | G | A | 0.02    | 0.081597 | 0.23665  | 0.303975 | 1.24E-15    | 0.254114 | 0.0025 | 0.07155  |
| rs8050500  | C | T | -0.0226 | -0.03108 | 0.467568 | 0.480943 | 1.31E-29    | 0.637221 | 0.002  | 0.065896 |
| rs8067342  | T | C | -0.0186 | -0.15953 | 0.290883 | 0.260712 | 6.12E-16    | 0.034882 | 0.0023 | 0.075618 |
| rs8070401  | T | C | 0.0142  | 0.0218   | 0.715662 | 0.679865 | 3.29E-09    | 0.757583 | 0.0024 | 0.070627 |
| rs8176059  | A | G | -0.0651 | 0.091825 | 0.011311 | 0.005675 | 2.34E-09    | 0.831019 | 0.0109 | 0.430307 |

|           |   |   |         |          |          |          |             |          |        |          |
|-----------|---|---|---------|----------|----------|----------|-------------|----------|--------|----------|
| rs8193004 | T | C | -0.0112 | -0.0306  | 0.58056  | 0.596525 | 2.14E-08    | 0.649208 | 0.002  | 0.067263 |
| rs833058  | T | C | 0.0161  | 0.005094 | 0.421888 | 0.384799 | 1.77E-14    | 0.939915 | 0.0021 | 0.067587 |
| rs838717  | A | G | 0.016   | 0.011705 | 0.569843 | 0.585687 | 1.24E-15    | 0.861393 | 0.002  | 0.067036 |
| rs857725  | G | T | 0.0657  | -0.07305 | 0.286586 | 0.338518 | 5.84E-196   | 0.294573 | 0.0022 | 0.069691 |
| rs879253  | T | C | -0.018  | 0.025196 | 0.612114 | 0.631246 | 2.8E-16     | 0.712152 | 0.0022 | 0.068288 |
| rs888083  | T | C | -0.0146 | -0.08944 | 0.440554 | 0.476435 | 2.88E-13    | 0.175166 | 0.002  | 0.065969 |
| rs892448  | G | A | 0.0151  | -0.02092 | 0.815856 | 0.802761 | 2.24E-08    | 0.801563 | 0.0027 | 0.083226 |
| rs924150  | C | A | -0.0129 | -0.05713 | 0.403006 | 0.475323 | 8.11E-10    | 0.389017 | 0.0021 | 0.066326 |
| rs9376091 | T | C | -0.0411 | 0.009629 | 0.275425 | 0.340145 | 2.04E-71    | 0.890237 | 0.0023 | 0.069776 |
| rs9604497 | C | T | 0.0204  | 0.042108 | 0.112606 | 0.097861 | 1.83E-10    | 0.707164 | 0.0032 | 0.112087 |
| rs9840088 | C | A | -0.0154 | 0.150919 | 0.280811 | 0.183118 | 1.39E-10    | 0.0766   | 0.0024 | 0.085229 |
| rs9845017 | T | A | -0.0246 | -0.13557 | 0.11016  | 0.092995 | 2.96E-11    | 0.23545  | 0.0037 | 0.114265 |
| rs9873618 | A | G | -0.0392 | -0.06426 | 0.27337  | 0.268598 | 3.91E-65    | 0.385028 | 0.0023 | 0.073981 |
| rs9892222 | C | T | 0.0274  | 0.013985 | 0.073021 | 0.072897 | 2.13E-12    | 0.912135 | 0.0039 | 0.126736 |
| rs9901806 | T | C | -0.0153 | -0.0103  | 0.531141 | 0.587294 | 3.2E-13     | 0.87781  | 0.0021 | 0.067002 |
| rs9909940 | T | C | 0.0589  | -0.09067 | 0.332503 | 0.264342 | 4.2708E-173 | 0.228488 | 0.0021 | 0.075294 |
| rs998584  | A | C | 0.0196  | 0.007702 | 0.493075 | 0.48223  | 1.13E-22    | 0.907644 | 0.002  | 0.066391 |

**Table S3 Heterogeneity**

**Table S3.1 HIV to Insulin resistance**

| exposure | outcome | method                    | Q        | Q_df | Q_pval   |
|----------|---------|---------------------------|----------|------|----------|
| HIV      | IR      | MR Egger                  | 4.89764  | 4    | 0.297962 |
| HIV      | IR      | Inverse variance weighted | 5.973581 | 5    | 0.308798 |

**Table S3.2 HIV to Type 1 diabetes**

| exposure | outcome | method                    | Q        | Q_df | Q_pval   |
|----------|---------|---------------------------|----------|------|----------|
| HIV      | D1M     | MR Egger                  | 30.6195  | 31   | 0.485499 |
| HIV      | D1M     | Inverse variance weighted | 33.84215 | 32   | 0.378639 |

**Table S3.3 HIV to Type 2 diabetes**

| <b>exposure</b> | <b>outcome</b> | <b>method</b>             | <b>Q</b> | <b>Q_df</b> | <b>Q_pval</b> |
|-----------------|----------------|---------------------------|----------|-------------|---------------|
| HIV             | T2D            | MR Egger                  | 1.517522 | 4           | 0.823533      |
| HIV             | T2D            | Inverse variance weighted | 6.255842 | 5           | 0.282114      |

**Table S3.4 HIV to Gestational diabetes**

| <b>exposure</b> | <b>outcome</b> | <b>method</b>             | <b>Q</b> | <b>Q_df</b> | <b>Q_pval</b> |
|-----------------|----------------|---------------------------|----------|-------------|---------------|
| HIV             | GDM            | MR Egger                  | 31.66141 | 32          | 0.483626      |
| HIV             | GDM            | Inverse variance weighted | 36.88717 | 33          | 0.29381       |

**Table S3.5 Insulin resistance to HIV**

| <b>exposure</b> | <b>outcome</b> | <b>method</b>             | <b>Q</b> | <b>Q_df</b> | <b>Q_pval</b> |
|-----------------|----------------|---------------------------|----------|-------------|---------------|
| IR              | HIV            | MR Egger                  | 37.86977 | 45          | 0.765498      |
| IR              | HIV            | Inverse variance weighted | 38.49505 | 46          | 0.776075      |

**Table S3.6 Type 1 diabetes to HIV**

| <b>exposure</b> | <b>outcome</b> | <b>method</b>             | <b>Q</b> | <b>Q_df</b> | <b>Q_pval</b> |
|-----------------|----------------|---------------------------|----------|-------------|---------------|
| T1D             | HIV            | MR Egger                  | 58.25184 | 70          | 0.840715      |
| T1D             | HIV            | Inverse variance weighted | 58.65333 | 71          | 0.852282      |

**Table S3.7 Type 2 diabetes to HIV**

| <b>exposure</b> | <b>outcome</b> | <b>method</b>             | <b>Q</b> | <b>Q_df</b> | <b>Q_pval</b> |
|-----------------|----------------|---------------------------|----------|-------------|---------------|
| T2D             | HIV            | MR Egger                  | 83.74291 | 112         | 0.978804      |
| T2D             | HIV            | Inverse variance weighted | 83.74837 | 113         | 0.982106      |

**Table S3.8 Gestational diabetes to HIV**

| <b>exposure</b> | <b>outcome</b> | <b>method</b>             | <b>Q</b> | <b>Q_df</b> | <b>Q_pval</b> |
|-----------------|----------------|---------------------------|----------|-------------|---------------|
| GDM             | HIV            | MR Egger                  | 18.78861 | 15          | 0.223473      |
| GDM             | HIV            | Inverse variance weighted | 19.60669 | 16          | 0.23846       |

**Table S3.9 HIV to Glycated hemoglobin**

| <b>exposure</b> | <b>outcome</b> | <b>method</b>             | <b>Q</b> | <b>Q_df</b> | <b>Q_pval</b> |
|-----------------|----------------|---------------------------|----------|-------------|---------------|
| HIV             | HbA1c          | MR Egger                  | 39.88226 | 32          | 0.159576      |
| HIV             | HbA1c          | Inverse variance weighted | 41.9138  | 33          | 0.137408      |

**Table S3.10 Glycated hemoglobin to HIV**

| <b>exposure</b> | <b>outcome</b> | <b>method</b>             | <b>Q</b> | <b>Q_df</b> | <b>Q_pval</b> |
|-----------------|----------------|---------------------------|----------|-------------|---------------|
| HbA1c           | HIV            | MR Egger                  | 250.5205 | 274         | 0.842426      |
| HbA1c           | HIV            | Inverse variance weighted | 250.566  | 275         | 0.85217       |

**Table S4 MR-PRESSO**

**Table S4.1 HIV to Insulin resistance**

| <b>SNP</b> | <b>RSSobs</b> | <b>Pvalue</b> |
|------------|---------------|---------------|
| NA         |               |               |

**Table S4.2 HIV to Type 1 diabetes**

| <b>SNP</b> | <b>RSSobs</b> | <b>Pvalue</b> |
|------------|---------------|---------------|
| NA         |               |               |

**Table S4.3 HIV to Type 2 diabetes**

| <b>SNP</b> | <b>RSSobs</b> | <b>Pvalue</b> |
|------------|---------------|---------------|
| NA         |               |               |

**Table S4.4 HIV to Gestational diabetes**

| <b>SNP</b> | <b>RSSobs</b> | <b>Pvalue</b> |
|------------|---------------|---------------|
| rs17453643 | 0.009006      | 0.036         |
| rs3814845  | 0.003632      | 0.036         |

**\*After excluding the above 2 outliers, analyse again without outliers.**

**Table S4.5 Insulin resistance to HIV**

| <b>SNP</b> | <b>RSSobs</b> | <b>Pvalue</b> |
|------------|---------------|---------------|
| NA         |               |               |

**Table S4.6 Type 1 diabetes to HIV**

| <b>SNP</b> | <b>RSSobs</b> | <b>Pvalue</b> |
|------------|---------------|---------------|
| NA         |               |               |

**Table S4.7 Type 2 diabetes to HIV**

| <b>SNP</b> | <b>RSSobs</b> | <b>Pvalue</b> |
|------------|---------------|---------------|
| NA         |               |               |

**Table S4.8 Gestational diabetes to HIV**

| <b>SNP</b> | <b>RSSobs</b> | <b>Pvalue</b> |
|------------|---------------|---------------|
| NA         |               |               |

**Table S4.9 HIV to Glycated hemoglobin**

| <b>SNP</b> | <b>RSSobs</b> | <b>Pvalue</b> |
|------------|---------------|---------------|
| NA         |               |               |

**Table S4.10 Glycated hemoglobin to HIV**

| SNP | RSSobs | Pvalue |
|-----|--------|--------|
| NA  |        |        |

**Table S5 Pleiotropy**

**Table S5.1 HIV to Insulin resistance**

| exposure | outcome | egger_intercept | se       | pval     |
|----------|---------|-----------------|----------|----------|
| HIV      | IR      | 0.010888        | 0.011615 | 0.401619 |

**Table S5.2 HIV to Type 1 diabetes**

| exposure | outcome | egger_intercept | se       | pval     |
|----------|---------|-----------------|----------|----------|
| HIV      | D1M     | 0.017238        | 0.009602 | 0.082382 |

**Table S5.3 HIV to Type 2 diabetes**

| exposure | outcome | egger_intercept | se       | pval     |
|----------|---------|-----------------|----------|----------|
| HIV      | T2D     | 0.039584        | 0.018185 | 0.095087 |

**Table S5.4 HIV to Gestational diabetes**

| exposure | outcome | egger_intercept | se       | pval    |
|----------|---------|-----------------|----------|---------|
| HIV      | GDM     | 0.020758        | 0.009081 | 0.02902 |

**Table S5.5 Insulin resistance to HIV**

| exposure | outcome | egger_intercept | se       | pval     |
|----------|---------|-----------------|----------|----------|
| IR       | HIV     | -0.02622        | 0.033156 | 0.433241 |

**Table S5.6 Type 1 diabetes to HIV**

| <b>exposure</b> | <b>outcome</b> | <b>egger_intercept</b> | <b>se</b> | <b>pval</b> |
|-----------------|----------------|------------------------|-----------|-------------|
| T1D             | HIV            | 0.009665               | 0.015253  | 0.528385    |

**Table S5.7 Type 2 diabetes to HIV**

| <b>exposure</b> | <b>outcome</b> | <b>egger_intercept</b> | <b>se</b> | <b>pval</b> |
|-----------------|----------------|------------------------|-----------|-------------|
| T2D             | HIV            | 0.001336               | 0.018083  | 0.941251    |

**Table S5.8 Gestational diabetes to HIV**

| <b>exposure</b> | <b>outcome</b> | <b>egger_intercept</b> | <b>se</b> | <b>pval</b> |
|-----------------|----------------|------------------------|-----------|-------------|
| GDM             | HIV            | -0.03403               | 0.042114  | 0.431632    |

**Table S5.9 HIV to Glycated hemoglobin**

| <b>exposure</b> | <b>outcome</b> | <b>egger_intercept</b> | <b>se</b> | <b>pval</b> |
|-----------------|----------------|------------------------|-----------|-------------|
| HIV             | HbA1c          | 0.001941               | 0.00152   | 0.210886    |

**Table S5.10 Glycated hemoglobin to HIV**

| <b>exposure</b> | <b>outcome</b> | <b>egger_intercept</b> | <b>se</b> | <b>pval</b> |
|-----------------|----------------|------------------------|-----------|-------------|
| HbA1c           | HIV            | 0.001928               | 0.009039  | 0.831234    |

Supplementary Information of Figure

Figure S1. The funnel plots of MR analysis for HIV infection on insulin resistance and diabetes mellitus

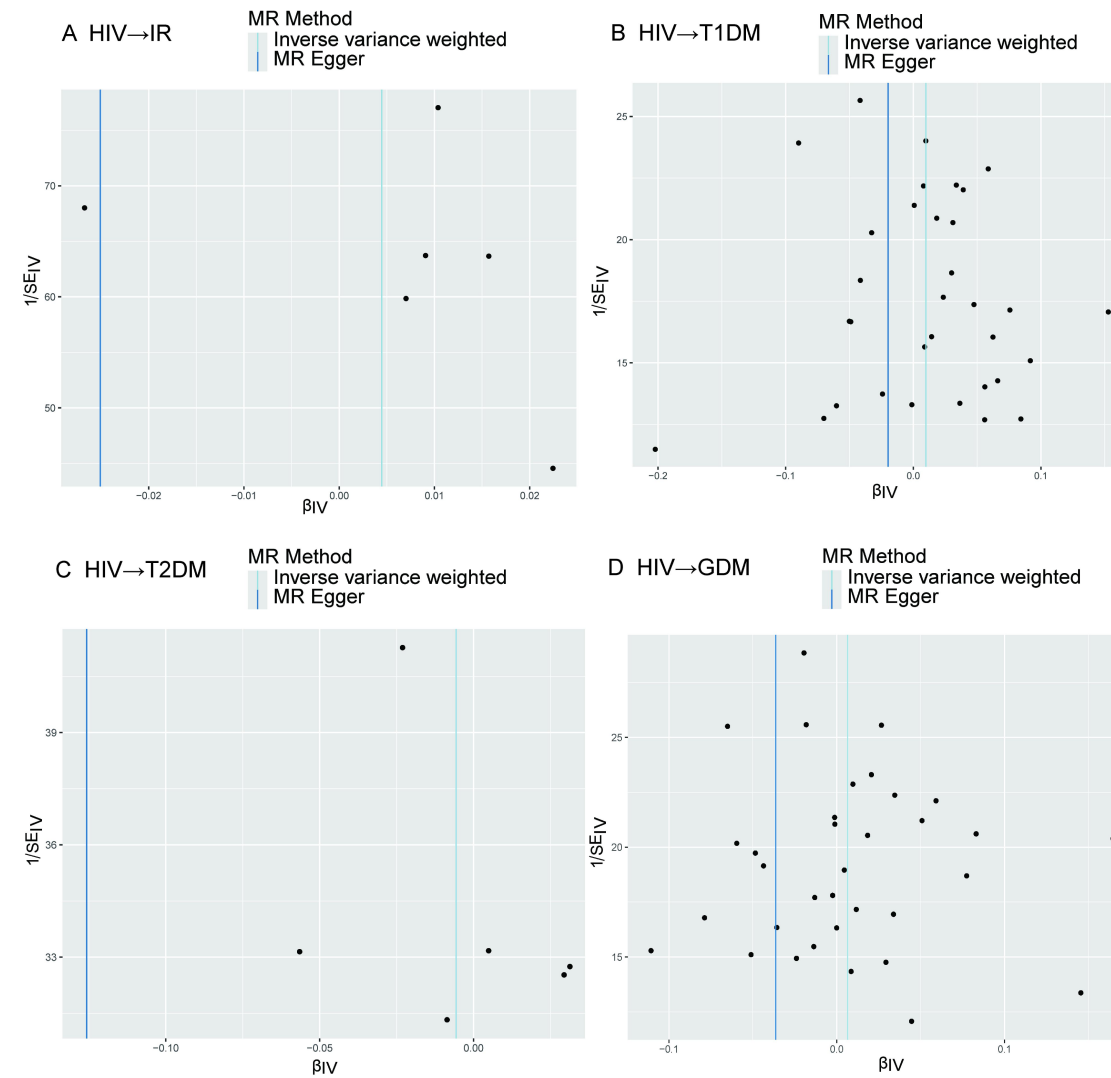

**Figure S1:** A shows the funnel plot of MR analysis of HIV infection with IR; B shows the funnel plot of MR analysis of HIV infection with T1D; C shows the funnel plot of MR analysis of HIV infection with T2D; D shows the funnel plot of MR analysis of HIV infection with GDM.

**Figure S2. The forest plots of MR analysis for HIV infection on insulin resistance and diabetes mellitus**

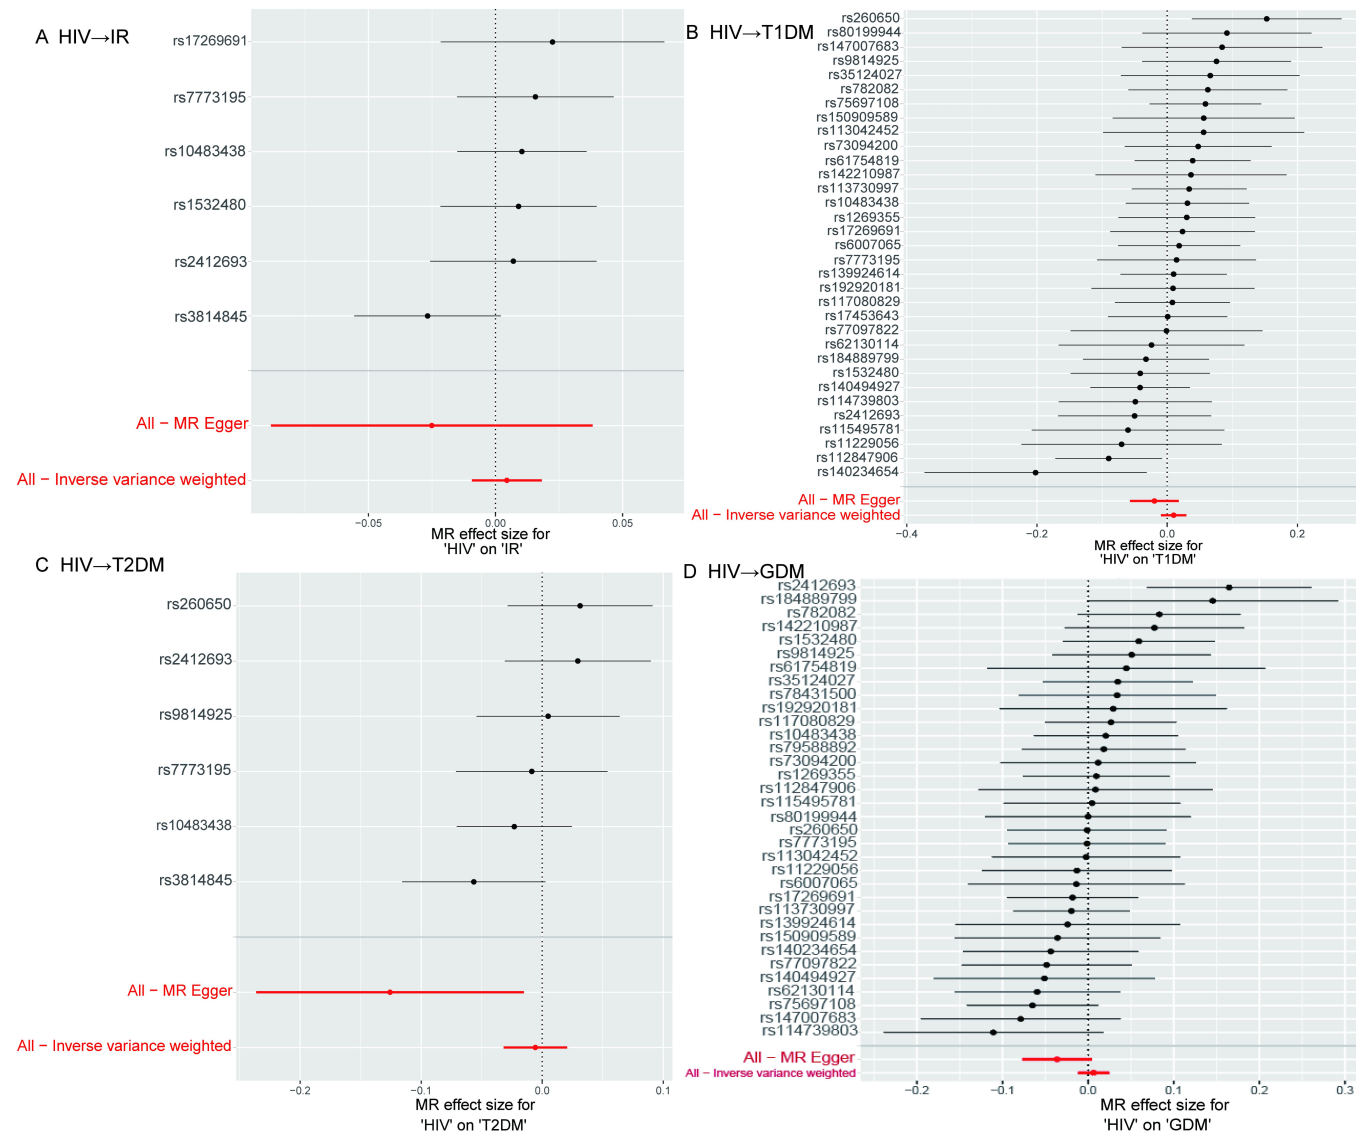

**Figure S2:** A shows the forest plot of MR analysis of HIV infection with IR; B shows the forest plot of MR analysis of HIV infection with T1D; C shows the forest plot of MR analysis of HIV infection with T2D; D shows the forest plot of MR analysis of HIV infection with GDM.

**Figure S3. The leave-one-out plots of MR analysis for HIV infection on insulin resistance and diabetes mellitus**

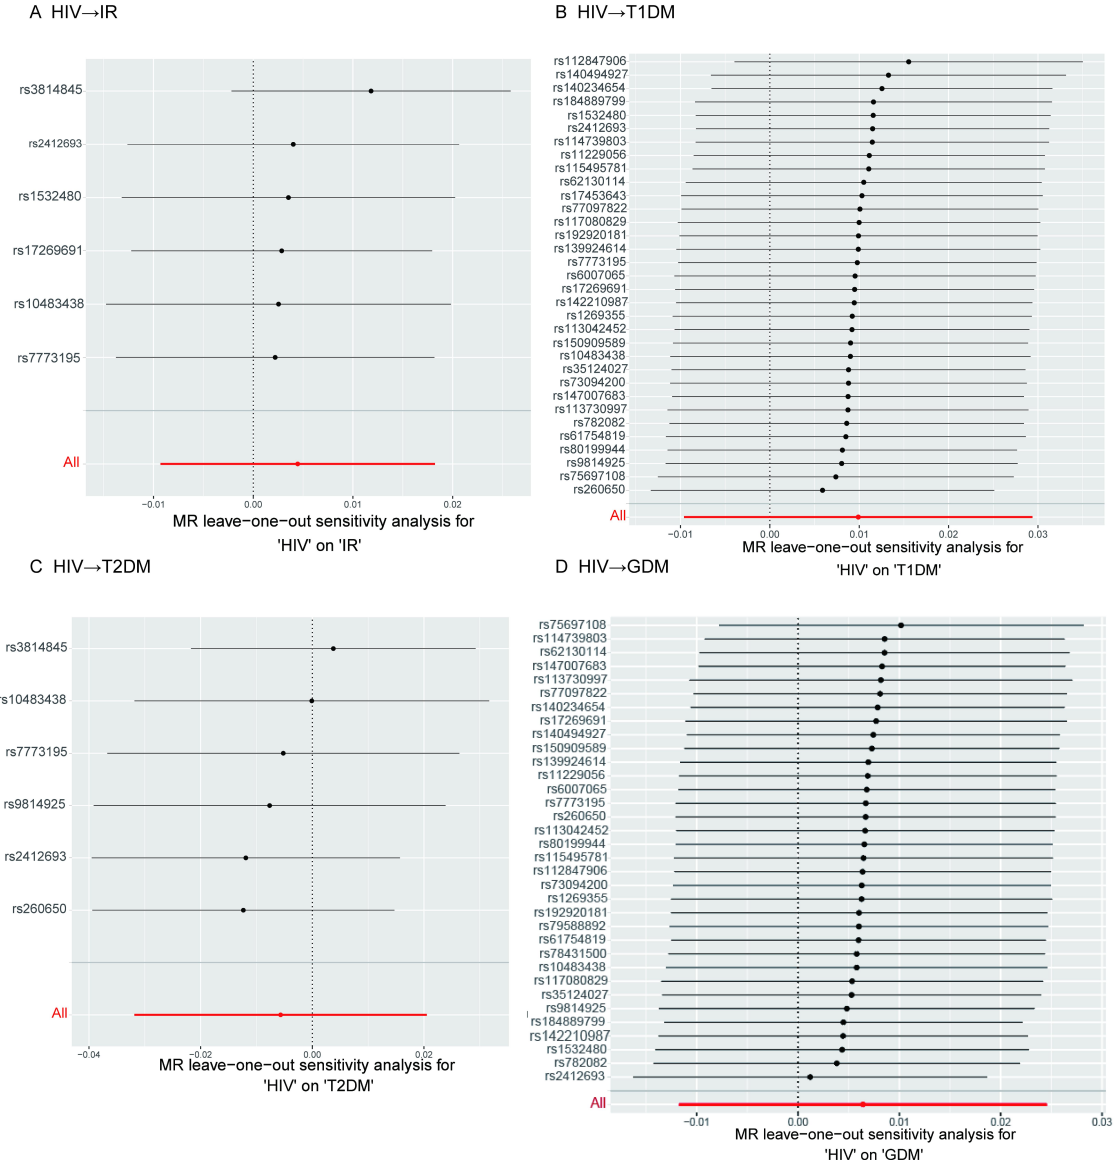

**Figure S3:** A shows the leave-one-out plot of MR analysis of HIV infection with IR; B shows the leave-one-out plot of MR analysis of HIV infection with T1D; C shows the leave-one-out plot of MR analysis of HIV infection with T2D; D shows the leave-one-out plot of MR analysis of HIV infection with GDM.

**Figure S4.** The funnel plots of MR analysis for insulin resistance and diabetes mellitus on HIV infection

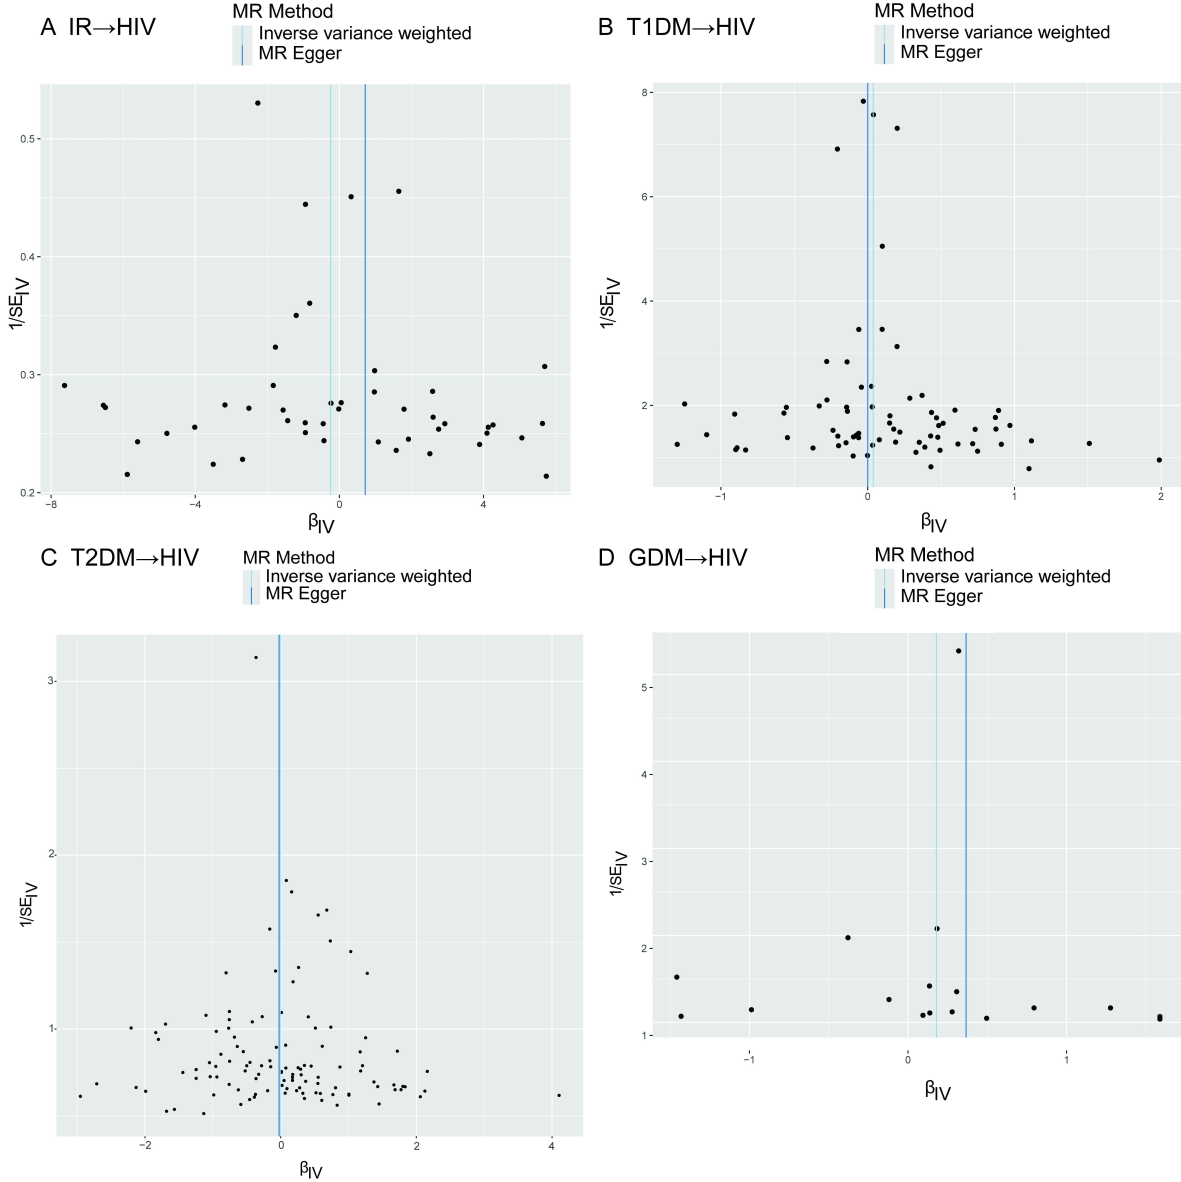

**Figure S4:** A shows the funnel plot of MR analysis of IR and HIV infection; B shows the funnel plot of MR analysis of T1D and HIV infection; C shows the funnel plot of MR analysis of T2D and HIV infection; and D shows the funnel plot of MR analysis of GDM and HIV infection.

**Figure S5.** The forest plots of MR analysis for insulin resistance and diabetes mellitus on HIV infection

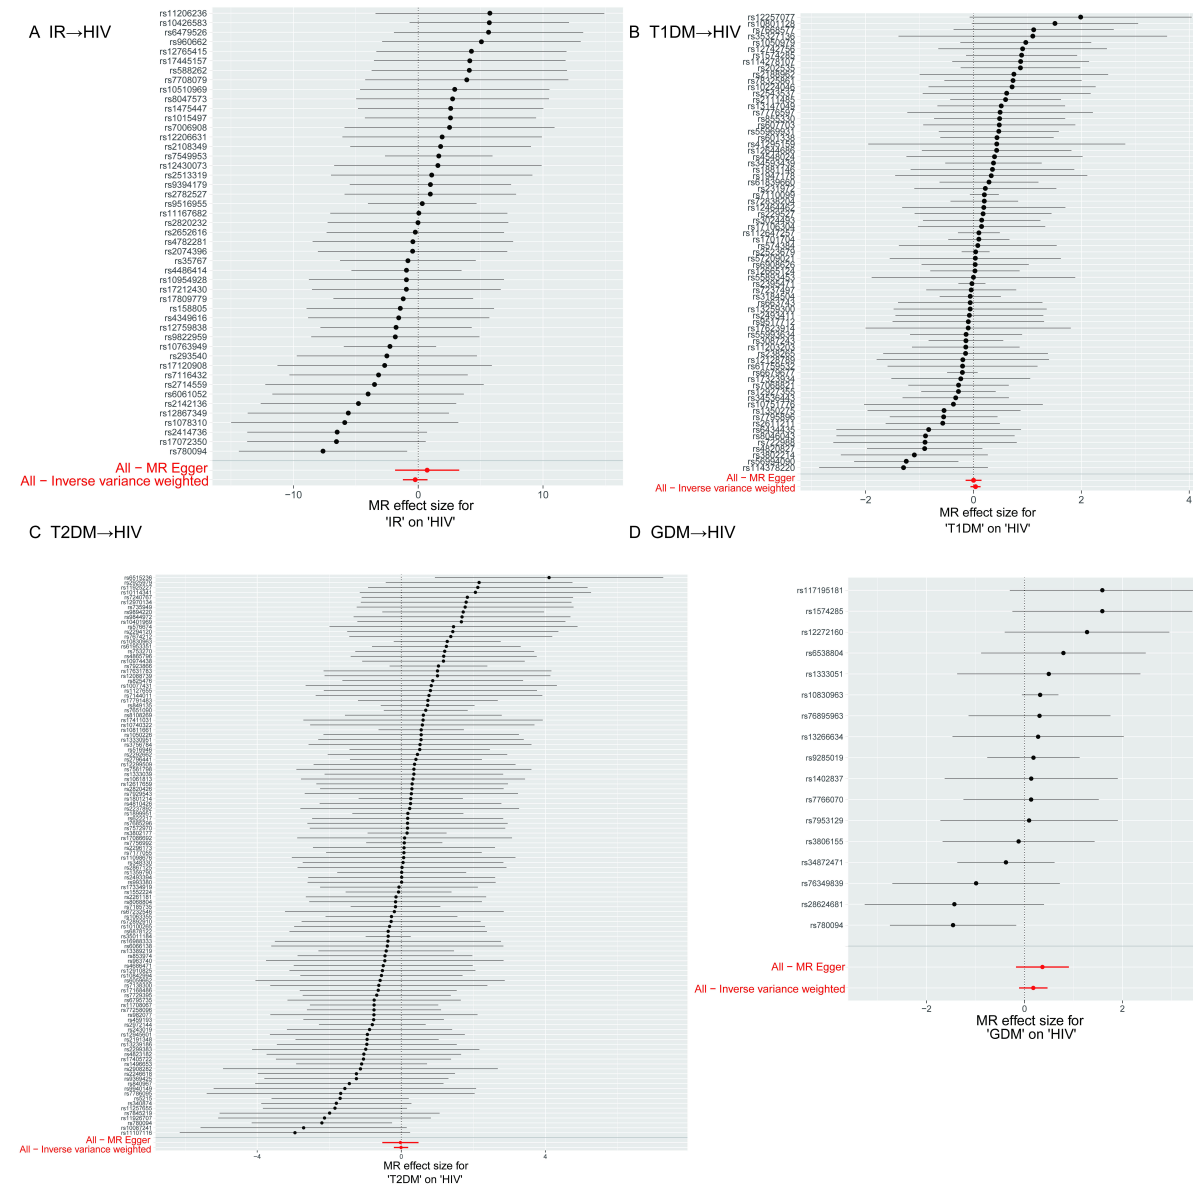

**Figure S5:** A shows the forest plot of MR analysis of IR and HIV infection; B shows the forest plot of MR analysis of T1D and HIV infection; C shows the forest plot of MR analysis of T2D and HIV infection; and D shows the forest plot of MR analysis of GDM and HIV infection.

**Figure S6. The leave-one-out plots of MR analysis for insulin resistance and diabetes mellitus on HIV infection**

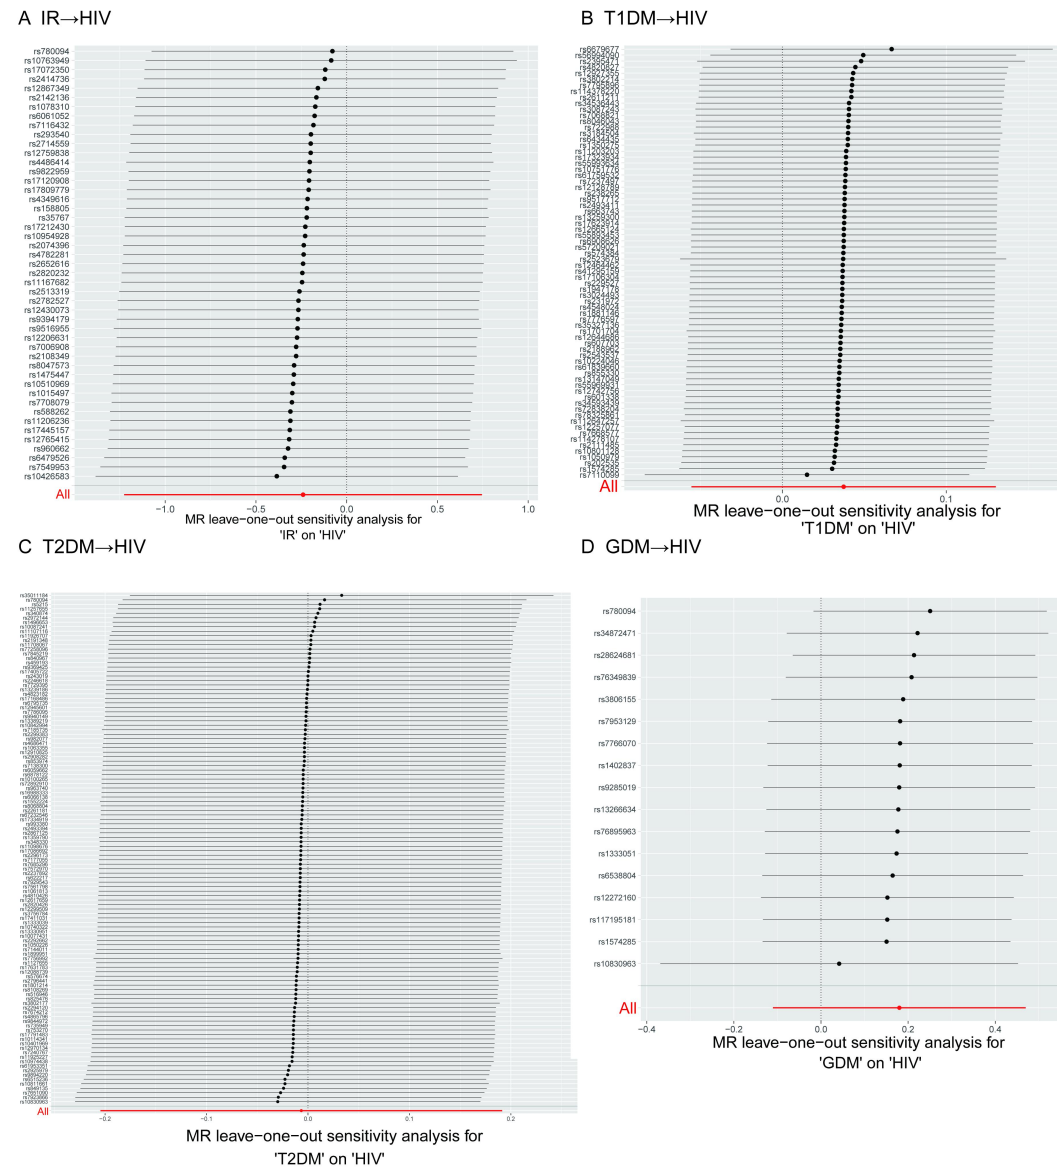

**Figure S6:** A shows the leave-one-out plot of MR analysis of IR and HIV infection; B shows the leave-one-out plot of MR analysis of T1D and HIV infection; C shows the leave-one-out plot of MR analysis of T2D and HIV infection; and D shows the leave-one-out plot of MR analysis of GDM and HIV infection.

**Figure S7: The Funnel, Forest and Leave-one-out plots of MR analysis for HIV infection on glycated hemoglobin**

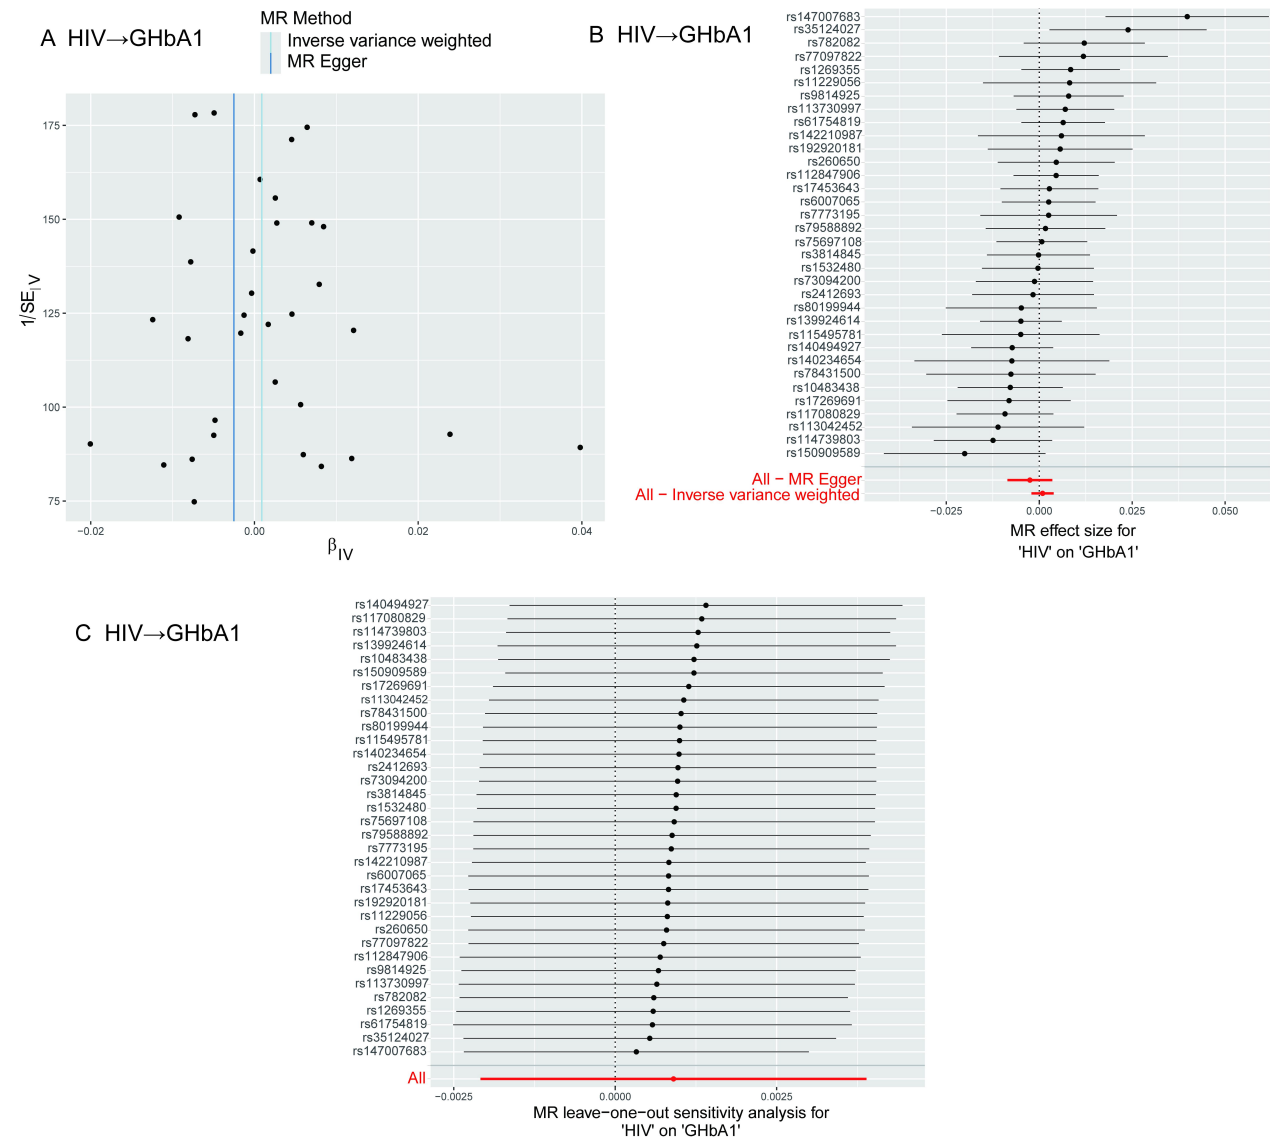

**Figure S7:** A shows the funnel plot of MR analysis of HIV infection with glycated hemoglobin; B shows the forest plot of MR analysis of HIV infection with glycated hemoglobin; C shows the leave-one-out plot of MR analysis of HIV infection with glycated hemoglobin.

**Figure S8: The Funnel, Forest and Leave-one-out plots of MR analysis for glyated hemoglobin on HIV infection**

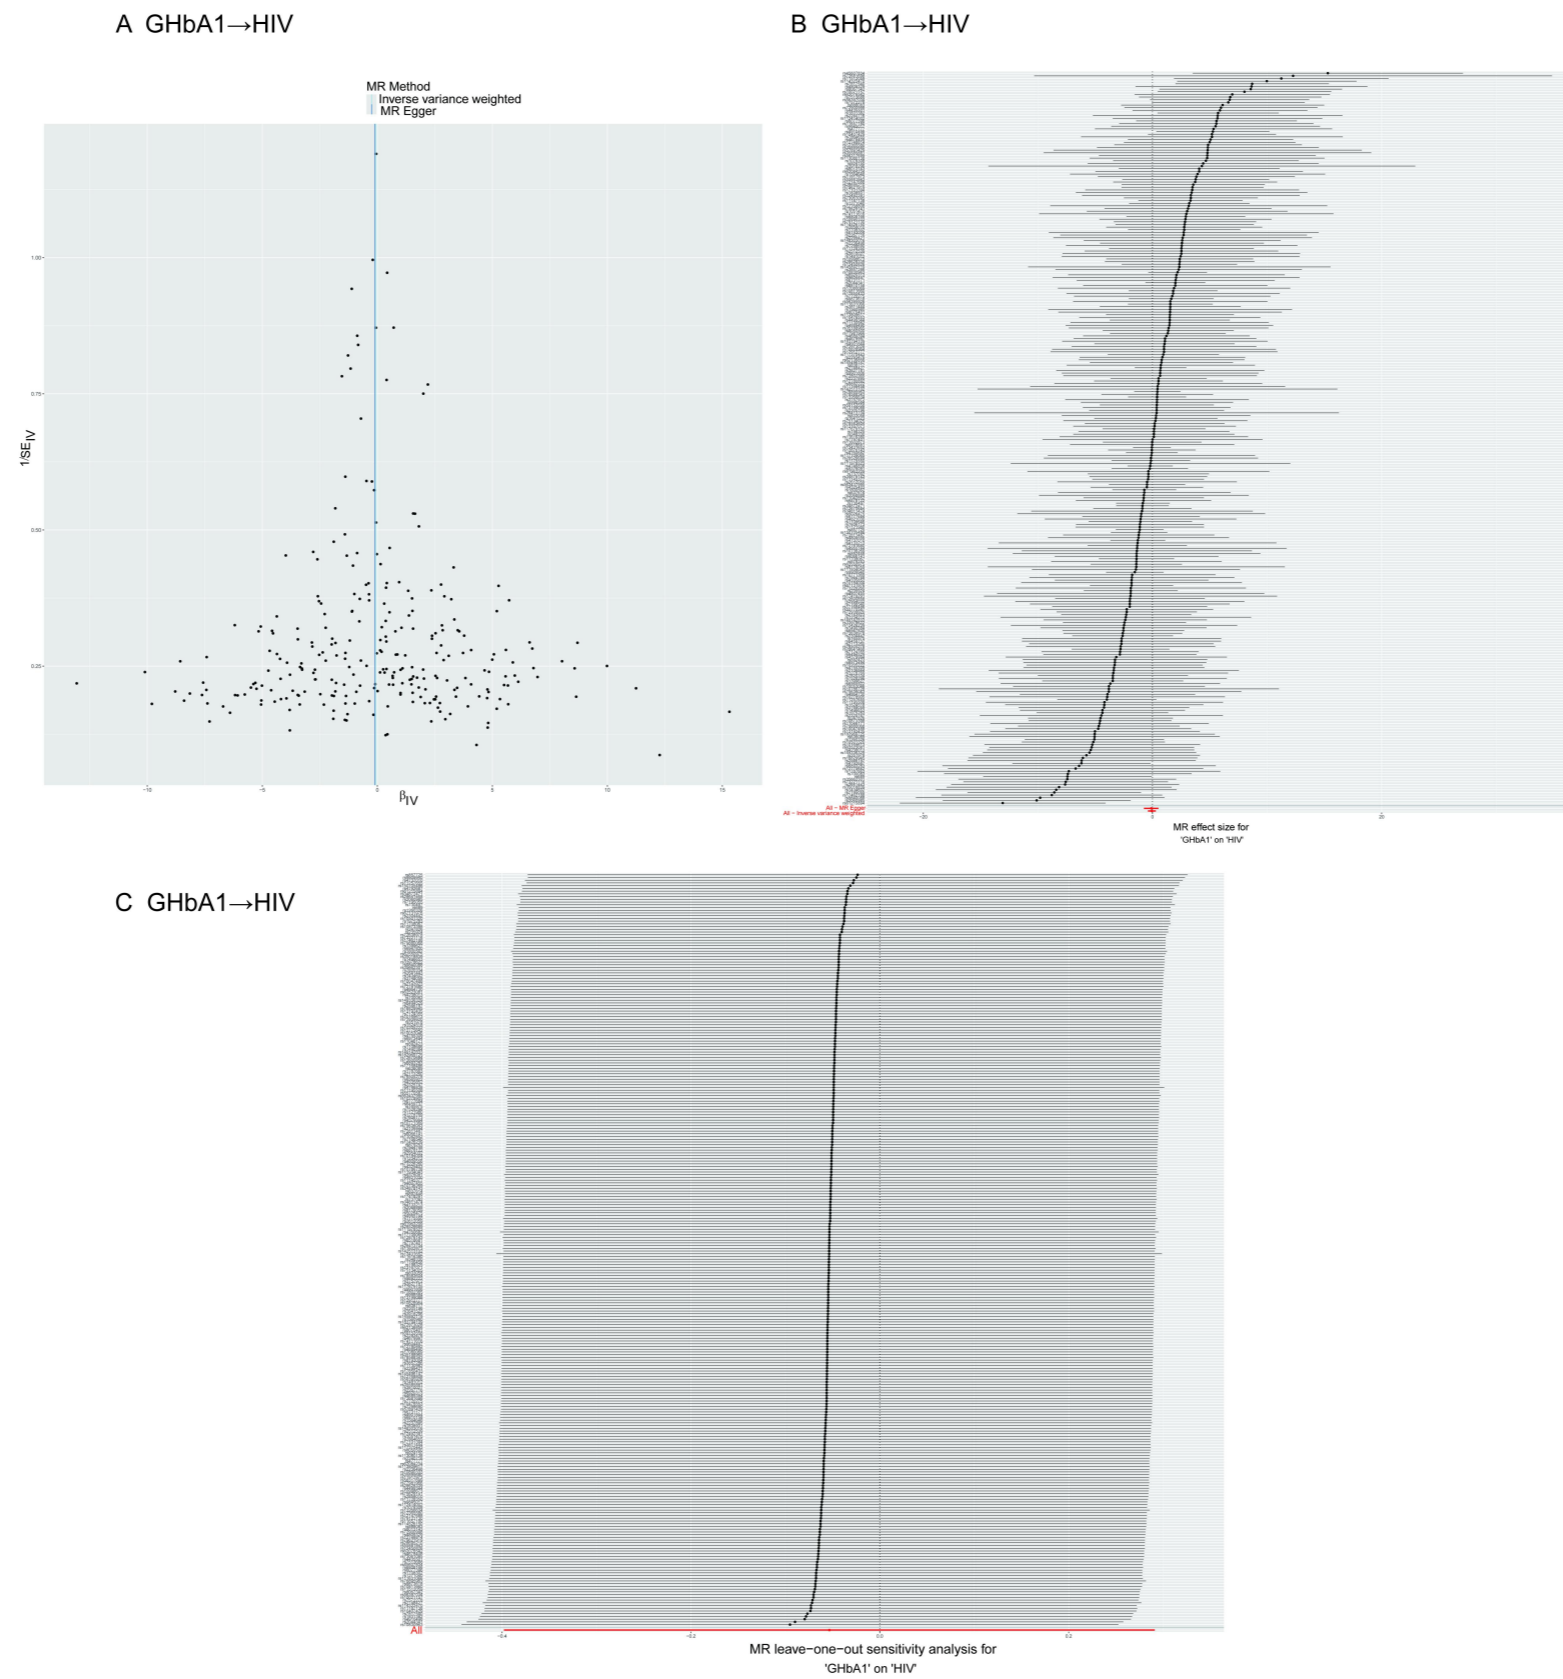

**Figure S8:** A shows the funnel plot of MR analysis of glyated hemoglobin and HIV infection; B shows the forest plot of MR analysis of glyated hemoglobin and HIV infection; C shows the leave-one-out plot of MR analysis of glyated hemoglobin and HIV infection.
